# Supplementary material for: Identification of the Golden-2-like transcription factors gene family in Gossypium hirsutum
Source: PeerJ. 2021 Nov 16;9:e12484. doi: 10.7717/peerj.12484 (PMC8603818; doi:10.7717/peerj.12484)
Supplement: Supplemental Information 2 [file peerj-09-12484-s002.xlsx]

## Sheet: Sheet1
Table S2:Physico-chemical and biochemical characteristics of GLK genes in Gossypium hirsutum.
Gene name	Transcript ID	ORF Length(bp)	Length (aa)	Genomic location	MW (Da)	pI	Istability index	Subcellular prediction	GO term
GhGLK1	Ghir_A01G002010	1275	424	ChrA01: 1825932-1828537 -	46624.5	6.01	54.49	Nucleus	GO:0008150,GO:0003674,GO:0005575,GO:0008152,GO:0009987,GO:0005488,GO:0005623,GO:0071704,GO:0044464,GO:0044238,GO:0044237,GO:0005622,GO:0044424,GO:0043170,GO:0097159,GO:1901363,GO:0043226,GO:0043229,GO:0044260,GO:0043227,GO:0043231,GO:0006807,GO:0009058,GO:0034641,GO:1901576,GO:0044249,GO:0065007,GO:0050789,GO:1901360,GO:0006725,GO:0046483,GO:0003676,GO:0006139,GO:0050794,GO:0010467,GO:0009059,GO:…
GhGLK2	Ghir_A01G002890	1407	468	ChrA01: 2639026-2643060 +	52346.6	8.26	50.34	Nucleus	GO:0008150,GO:0003674,GO:0005575,GO:0044699,GO:0044763,GO:0050896,GO:0001071,GO:0003700,GO:0051716,GO:0007154,GO:0023052,GO:0044700,GO:0007165,GO:0035556,GO:0008152,GO:0009987,GO:0005488,GO:0000160,GO:0005623,GO:0071704,GO:0044464,GO:0044238,GO:0044237,GO:0005622,GO:0044424,GO:0043170,GO:0097159,GO:1901363,GO:0043226,GO:0043229,GO:0044260,GO:0043227,GO:0043231,GO:0006807,GO:0009058,GO:0034641,GO:…
GhGLK3	Ghir_A01G013730	957	318	ChrA01: 74082920-74087116 +	35493.5	6.34	61.21	Nucleus	GO:0008150,GO:0003674,GO:0005575,GO:0008152,GO:0009987,GO:0005488,GO:0005623,GO:0071704,GO:0044464,GO:0044238,GO:0044237,GO:0005622,GO:0044424,GO:0043170,GO:0097159,GO:1901363,GO:0043226,GO:0043229,GO:0044260,GO:0043227,GO:0043231,GO:0006807,GO:0009058,GO:0034641,GO:1901576,GO:0044249,GO:0065007,GO:0050789,GO:1901360,GO:0006725,GO:0046483,GO:0003676,GO:0006139,GO:0050794,GO:0010467,GO:0009059,GO:…
GhGLK4	Ghir_A01G019080	939	312	ChrA01: 112998974-113003968 -	33778.6	6.5	65.6	Nucleus	GO:0008150,GO:0003674,GO:0005575,GO:0008152,GO:0009987,GO:0005488,GO:0005623,GO:0071704,GO:0044464,GO:0044238,GO:0044237,GO:0005622,GO:0044424,GO:0043170,GO:0097159,GO:1901363,GO:0043226,GO:0043229,GO:0044260,GO:0043227,GO:0043231,GO:0006807,GO:0009058,GO:0034641,GO:1901576,GO:0044249,GO:0065007,GO:0050789,GO:1901360,GO:0006725,GO:0046483,GO:0003676,GO:0006139,GO:0050794,GO:0010467,GO:0009059,GO:…
GhGLK5	Ghir_A01G022280	936	311	ChrA01: 117528416-117529756 -	35121.1	8.76	57.66	Nucleus	GO:0008150,GO:0003674,GO:0005575,GO:0008152,GO:0009987,GO:0005488,GO:0005623,GO:0071704,GO:0044464,GO:0044238,GO:0044237,GO:0005622,GO:0044424,GO:0043170,GO:0097159,GO:1901363,GO:0043226,GO:0043229,GO:0044260,GO:0043227,GO:0043231,GO:0006807,GO:0009058,GO:0034641,GO:1901576,GO:0044249,GO:0065007,GO:0050789,GO:1901360,GO:0006725,GO:0046483,GO:0003676,GO:0006139,GO:0050794,GO:0010467,GO:0009059,GO:…
GhGLK6	Ghir_A02G002530	1104	367	ChrA02: 2908334-2911783 -	40382.9	6.21	51.26	Chloroplast\Nucleus	GO:0008150,GO:0003674,GO:0005575,GO:0008152,GO:0009987,GO:0005488,GO:0005623,GO:0071704,GO:0044464,GO:0044238,GO:0044237,GO:0005622,GO:0044424,GO:0043170,GO:0097159,GO:1901363,GO:0043226,GO:0043229,GO:0044260,GO:0043227,GO:0043231,GO:0006807,GO:0009058,GO:0034641,GO:1901576,GO:0044249,GO:0065007,GO:0050789,GO:1901360,GO:0006725,GO:0046483,GO:0003676,GO:0006139,GO:0050794,GO:0010467,GO:0009059,GO:…
GhGLK7	Ghir_A02G017500	1071	356	ChrA02: 106223792-106226015 -	40744.7	5.64	55.5	Nucleus	GO:0008150,GO:0003674,GO:0005575,GO:0008152,GO:0009987,GO:0005488,GO:0005623,GO:0071704,GO:0044464,GO:0044238,GO:0044237,GO:0005622,GO:0044424,GO:0043170,GO:0097159,GO:1901363,GO:0043226,GO:0043229,GO:0044260,GO:0043227,GO:0043231,GO:0006807,GO:0009058,GO:0034641,GO:1901576,GO:0044249,GO:0065007,GO:0050789,GO:1901360,GO:0006725,GO:0046483,GO:0003676,GO:0006139,GO:0050794,GO:0010467,GO:0009059,GO:…
GhGLK8	Ghir_A03G000800	1614	537	ChrA03: 1233368-1238915 -	60194.9	5.68	48.93	Nucleus	GO:0008150,GO:0003674,GO:0005575,GO:0008152,GO:0009987,GO:0005488,GO:0005623,GO:0071704,GO:0044464,GO:0044238,GO:0044237,GO:0005622,GO:0044424,GO:0043170,GO:0097159,GO:1901363,GO:0043226,GO:0043229,GO:0044260,GO:0043227,GO:0043231,GO:0006807,GO:0009058,GO:0034641,GO:1901576,GO:0044249,GO:0065007,GO:0050789,GO:1901360,GO:0006725,GO:0046483,GO:0003676,GO:0006139,GO:0050794,GO:0010467,GO:0009059,GO:…
GhGLK9	Ghir_A03G005350	1050	349	ChrA03: 9391481-9394920 +	37610.6	5.07	44.63	Nucleus	GO:0008152,GO:0009987,GO:0071704,GO:0044238,GO:0044237,GO:0043170,GO:0044260,GO:0006807,GO:0009058,GO:0034641,GO:1901576,GO:0044249,GO:0065007,GO:0050789,GO:1901360,GO:0006725,GO:0046483,GO:0006139,GO:0050794,GO:0010467,GO:0009059,GO:0044271,GO:0034645,GO:0090304,GO:0016070,GO:1901362,GO:0018130,GO:0019438,GO:0034654,GO:0032774,GO:0097659,GO:0006351
GhGLK10	Ghir_A03G011480	1095	364	ChrA03: 65797858-65802394 -	40578.8	6.42	51.83	Nucleus	GO:0008150,GO:0003674,GO:0005575,GO:0008152,GO:0009987,GO:0005488,GO:0005623,GO:0071704,GO:0044464,GO:0044238,GO:0044237,GO:0005622,GO:0044424,GO:0043170,GO:0097159,GO:1901363,GO:0043226,GO:0043229,GO:0044260,GO:0043227,GO:0043231,GO:0006807,GO:0009058,GO:0034641,GO:1901576,GO:0044249,GO:0065007,GO:0050789,GO:1901360,GO:0006725,GO:0046483,GO:0003676,GO:0006139,GO:0050794,GO:0010467,GO:0009059,GO:…
GhGLK11	Ghir_A03G013230	2010	669	ChrA03: 84995067-85000889 -	72615.8	6.38	51.8	Nucleus	GO:0008150,GO:0003674,GO:0005575,GO:0008152,GO:0009987,GO:0005488,GO:0005623,GO:0071704,GO:0044464,GO:0044238,GO:0044237,GO:0005622,GO:0044424,GO:0043170,GO:0097159,GO:1901363,GO:0043226,GO:0043229,GO:0044260,GO:0043227,GO:0043231,GO:0006807,GO:0009058,GO:0034641,GO:1901576,GO:0044249,GO:0065007,GO:0050789,GO:1901360,GO:0006725,GO:0046483,GO:0003676,GO:0006139,GO:0050794,GO:0010467,GO:0009059,GO:…
GhGLK12	Ghir_A03G014540	1722	573	ChrA03: 93088027-93091712 -	64369.7	5.12	42.28	Nucleus	GO:0008150,GO:0003674,GO:0005575,GO:0008152,GO:0009987,GO:0005488,GO:0005623,GO:0071704,GO:0044464,GO:0044238,GO:0044237,GO:0005622,GO:0044424,GO:0043170,GO:0097159,GO:1901363,GO:0043226,GO:0043229,GO:0044260,GO:0043227,GO:0043231,GO:0006807,GO:0009058,GO:0034641,GO:1901576,GO:0044249,GO:0065007,GO:0050789,GO:1901360,GO:0006725,GO:0046483,GO:0003676,GO:0006139,GO:0050794,GO:0010467,GO:0009059,GO:…
GhGLK13	Ghir_A04G010220	1056	351	ChrA04: 74647489-74649747 -	39800	7.25	58.04	Nucleus	GO:0008150,GO:0003674,GO:0005575,GO:0008152,GO:0009987,GO:0005488,GO:0005623,GO:0071704,GO:0044464,GO:0044238,GO:0044237,GO:0005622,GO:0044424,GO:0043170,GO:0097159,GO:1901363,GO:0043226,GO:0043229,GO:0044260,GO:0043227,GO:0043231,GO:0006807,GO:0009058,GO:0034641,GO:1901576,GO:0044249,GO:0065007,GO:0050789,GO:1901360,GO:0006725,GO:0046483,GO:0003676,GO:0006139,GO:0050794,GO:0010467,GO:0009059,GO:…
GhGLK14	Ghir_A04G011020	1320	439	ChrA04: 77624796-77627763 +	48393.4	6.56	60.91	Nucleus	GO:0008150,GO:0003674,GO:0005575,GO:0008152,GO:0009987,GO:0005488,GO:0005623,GO:0071704,GO:0044464,GO:0044238,GO:0044237,GO:0005622,GO:0044424,GO:0043170,GO:0097159,GO:1901363,GO:0043226,GO:0043229,GO:0044260,GO:0043227,GO:0043231,GO:0006807,GO:0009058,GO:0034641,GO:1901576,GO:0044249,GO:0065007,GO:0050789,GO:1901360,GO:0006725,GO:0046483,GO:0003676,GO:0006139,GO:0050794,GO:0010467,GO:0009059,GO:…
GhGLK15	Ghir_A04G013150	1179	392	ChrA04: 81850576-81853169 -	44429.7	8.75	59.69	Nucleus	GO:0008150,GO:0003674,GO:0005575,GO:0008152,GO:0009987,GO:0005488,GO:0005623,GO:0071704,GO:0044464,GO:0044238,GO:0044237,GO:0005622,GO:0044424,GO:0043170,GO:0097159,GO:1901363,GO:0043226,GO:0043229,GO:0044260,GO:0043227,GO:0043231,GO:0006807,GO:0009058,GO:0034641,GO:1901576,GO:0044249,GO:0065007,GO:0050789,GO:1901360,GO:0006725,GO:0046483,GO:0003676,GO:0006139,GO:0050794,GO:0010467,GO:0009059,GO:…
GhGLK16	Ghir_A04G015960	873	290	ChrA04: 85008417-85010901 +	32421.5	8.65	58.96	Nucleus	GO:0008150,GO:0003674,GO:0005575,GO:0008152,GO:0009987,GO:0005488,GO:0005623,GO:0071704,GO:0044464,GO:0044238,GO:0044237,GO:0005622,GO:0044424,GO:0043170,GO:0097159,GO:1901363,GO:0043226,GO:0043229,GO:0044260,GO:0043227,GO:0043231,GO:0006807,GO:0009058,GO:0034641,GO:1901576,GO:0044249,GO:0065007,GO:0050789,GO:1901360,GO:0006725,GO:0046483,GO:0003676,GO:0006139,GO:0050794,GO:0010467,GO:0009059,GO:…
GhGLK17	Ghir_A05G002140	1416	471	ChrA05: 2049126-2051933 -	50933.6	6.61	54.21	Nucleus	GO:0008150,GO:0003674,GO:0005575,GO:0008152,GO:0009987,GO:0005488,GO:0005623,GO:0071704,GO:0044464,GO:0044238,GO:0044237,GO:0005622,GO:0044424,GO:0043170,GO:0097159,GO:1901363,GO:0043226,GO:0043229,GO:0044260,GO:0043227,GO:0043231,GO:0006807,GO:0009058,GO:0034641,GO:1901576,GO:0044249,GO:0065007,GO:0050789,GO:1901360,GO:0006725,GO:0046483,GO:0003676,GO:0006139,GO:0050794,GO:0010467,GO:0009059,GO:…
GhGLK18	Ghir_A05G005320	2094	697	ChrA05: 5050716-5054550 +	76256.7	5.6	36.54	Nucleus	GO:0008150,GO:0003674,GO:0005575,GO:0044699,GO:0032501,GO:0044767,GO:0044707,GO:0007275,GO:0032502,GO:0044702,GO:0048856,GO:0048731,GO:0000003,GO:0022414,GO:0009791,GO:0007389,GO:0003002,GO:0003006,GO:0099402,GO:0048367,GO:0048608,GO:0061458,GO:0090567,GO:0048827,GO:0009908,GO:0009798,GO:0009955,GO:0009943,GO:0009944,GO:0065001,GO:0048437,GO:0048438,GO:0048467,GO:0048440,GO:0035670,GO:0048481,GO:…
GhGLK19	Ghir_A05G006020	1980	659	ChrA05: 5596330-5600639 +	72319.5	5.67	43.54	Nucleus	GO:0008150,GO:0003674,GO:0005575,GO:0044699,GO:0044763,GO:0050896,GO:0051716,GO:0007154,GO:0023052,GO:0044700,GO:0007165,GO:0035556,GO:0008152,GO:0009987,GO:0005488,GO:0000160,GO:0005623,GO:0071704,GO:0044464,GO:0044238,GO:0044237,GO:0005622,GO:0044424,GO:0043170,GO:0097159,GO:1901363,GO:0043226,GO:0043229,GO:0044260,GO:0043227,GO:0043231,GO:0006807,GO:0009058,GO:0034641,GO:1901576,GO:0044249,GO:…
GhGLK20	Ghir_A05G011050	504	167	ChrA05: 9973346-9975039 -	18905.5	9.67	57.7	Nucleus	GO:0008150,GO:0003674,GO:0005575,GO:0044699,GO:0044763,GO:0050896,GO:0051716,GO:0007154,GO:0023052,GO:0044700,GO:0007165,GO:0035556,GO:0008152,GO:0009987,GO:0005488,GO:0000160,GO:0005623,GO:0071704,GO:0044464,GO:0044238,GO:0044237,GO:0005622,GO:0044424,GO:0043170,GO:0097159,GO:1901363,GO:0043226,GO:0043229,GO:0044260,GO:0043227,GO:0043231,GO:0006807,GO:0009058,GO:0034641,GO:1901576,GO:0044249,GO:…
GhGLK21	Ghir_A05G011940	1455	484	ChrA05: 10880248-10884169 +	52891.2	5.76	63.92	Nucleus	GO:0008150,GO:0003674,GO:0005575,GO:0008152,GO:0009987,GO:0005488,GO:0005623,GO:0071704,GO:0044464,GO:0044238,GO:0044237,GO:0005622,GO:0044424,GO:0043170,GO:0097159,GO:1901363,GO:0043226,GO:0043229,GO:0044260,GO:0043227,GO:0043231,GO:0006807,GO:0009058,GO:0034641,GO:1901576,GO:0044249,GO:0065007,GO:0050789,GO:1901360,GO:0006725,GO:0046483,GO:0003676,GO:0006139,GO:0050794,GO:0010467,GO:0009059,GO:…
GhGLK22	Ghir_A05G015940	1149	382	ChrA05: 15000450-15005459 +	43548.9	8.7	58.14	Nucleus	GO:0008150,GO:0003674,GO:0005575,GO:0008152,GO:0009987,GO:0005488,GO:0005623,GO:0071704,GO:0044464,GO:0044238,GO:0044237,GO:0005622,GO:0044424,GO:0043170,GO:0097159,GO:1901363,GO:0043226,GO:0043229,GO:0044260,GO:0043227,GO:0043231,GO:0006807,GO:0009058,GO:0034641,GO:1901576,GO:0044249,GO:0065007,GO:0050789,GO:1901360,GO:0006725,GO:0046483,GO:0003676,GO:0006139,GO:0050794,GO:0010467,GO:0009059,GO:…
GhGLK23	Ghir_A05G020330	996	331	ChrA05: 19549703-19553857 -	36498.1	9.11	43.78	Nucleus	GO:0008150,GO:0003674,GO:0005575,GO:0008152,GO:0009987,GO:0005488,GO:0005623,GO:0071704,GO:0044464,GO:0044238,GO:0044237,GO:0005622,GO:0044424,GO:0043170,GO:0097159,GO:1901363,GO:0043226,GO:0043229,GO:0044260,GO:0043227,GO:0043231,GO:0006807,GO:0009058,GO:0034641,GO:1901576,GO:0044249,GO:0065007,GO:0050789,GO:1901360,GO:0006725,GO:0046483,GO:0003676,GO:0006139,GO:0050794,GO:0010467,GO:0009059,GO:…
GhGLK24	Ghir_A05G031820	558	185	ChrA05: 45893987-45897188 +	20635	9.32	75.84	Nucleus	GO:0008150,GO:0003674,GO:0005575,GO:0008152,GO:0009987,GO:0005488,GO:0005623,GO:0071704,GO:0044464,GO:0044238,GO:0044237,GO:0005622,GO:0044424,GO:0043170,GO:0097159,GO:1901363,GO:0043226,GO:0043229,GO:0044260,GO:0043227,GO:0043231,GO:0006807,GO:0009058,GO:0034641,GO:1901576,GO:0044249,GO:0065007,GO:0050789,GO:1901360,GO:0006725,GO:0046483,GO:0003676,GO:0006139,GO:0050794,GO:0010467,GO:0009059,GO:…
GhGLK25	Ghir_A06G001380	834	277	ChrA06: 1470633-1473645 -	30888.6	8.02	38.04	Nucleus	GO:0008150,GO:0003674,GO:0005575,GO:0032502,GO:0009888,GO:0010087,GO:0048856,GO:0010089,GO:0010088,GO:0008152,GO:0009987,GO:0005488,GO:0005623,GO:0071704,GO:0044464,GO:0044238,GO:0044237,GO:0005622,GO:0044424,GO:0043170,GO:0097159,GO:1901363,GO:0043226,GO:0043229,GO:0044260,GO:0043227,GO:0043231,GO:0006807,GO:0009058,GO:0034641,GO:1901576,GO:0044249,GO:0065007,GO:0050789,GO:1901360,GO:0006725,GO:…
GhGLK26	Ghir_A06G006200	1260	419	ChrA06: 11676649 -11678465 -	46721.8	8.88	55.39	Nucleus	GO:0008150,GO:0003674,GO:0005575,GO:0044699,GO:0044763,GO:0050896,GO:0001071,GO:0003700,GO:0051716,GO:0007154,GO:0023052,GO:0044700,GO:0007165,GO:0035556,GO:0008152,GO:0009987,GO:0005488,GO:0000160,GO:0005623,GO:0071704,GO:0044464,GO:0044238,GO:0044237,GO:0005622,GO:0044424,GO:0043170,GO:0097159,GO:1901363,GO:0043226,GO:0043229,GO:0044260,GO:0043227,GO:0043231,GO:0006807,GO:0009058,GO:0034641,GO:…
GhGLK27	Ghir_A06G014160	423	140	ChrA06: 95820765-95821885 -	15729.8	9.55	56.14	Nucleus	GO:0008150,GO:0003674,GO:0005575,GO:0044699,GO:0044763,GO:0050896,GO:0001071,GO:0003700,GO:0051716,GO:0007154,GO:0023052,GO:0044700,GO:0007165,GO:0035556,GO:0008152,GO:0009987,GO:0005488,GO:0000160,GO:0005623,GO:0071704,GO:0044464,GO:0044238,GO:0044237,GO:0005622,GO:0044424,GO:0043170,GO:0097159,GO:1901363,GO:0043226,GO:0043229,GO:0044260,GO:0043227,GO:0043231,GO:0006807,GO:0009058,GO:0034641,GO:…
GhGLK28	Ghir_A06G016090	882	293	ChrA06: 112723397-112725209 +	33024.9	9.51	59.94	Nucleus	GO:0008150,GO:0003674,GO:0005575,GO:0008152,GO:0009987,GO:0005488,GO:0005623,GO:0071704,GO:0044464,GO:0044238,GO:0044237,GO:0005622,GO:0044424,GO:0043170,GO:0097159,GO:1901363,GO:0043226,GO:0043229,GO:0044260,GO:0043227,GO:0043231,GO:0006807,GO:0009058,GO:0034641,GO:1901576,GO:0044249,GO:0065007,GO:0050789,GO:1901360,GO:0006725,GO:0046483,GO:0003676,GO:0006139,GO:0050794,GO:0010467,GO:0009059,GO:…
GhGLK29	Ghir_A06G022560	897	298	ChrA06: 123905134-123908689 +	32866	5.81	48.71	Nucleus	GO:0008150,GO:0003674,GO:0005575,GO:0008152,GO:0009987,GO:0005488,GO:0005623,GO:0071704,GO:0044464,GO:0044238,GO:0044237,GO:0005622,GO:0044424,GO:0043170,GO:0097159,GO:1901363,GO:0043226,GO:0043229,GO:0044260,GO:0043227,GO:0043231,GO:0006807,GO:0009058,GO:0034641,GO:1901576,GO:0044249,GO:0065007,GO:0050789,GO:1901360,GO:0006725,GO:0046483,GO:0003676,GO:0006139,GO:0050794,GO:0010467,GO:0009059,GO:…
GhGLK30	Ghir_A06G022570	1002	333	ChrA06: 123909513-123914594 +	35829.3	8.36	48.34	Nucleus	GO:0008150,GO:0003674,GO:0005575,GO:0008152,GO:0009987,GO:0005488,GO:0005623,GO:0071704,GO:0044464,GO:0044238,GO:0044237,GO:0005622,GO:0044424,GO:0043170,GO:0097159,GO:1901363,GO:0043226,GO:0043229,GO:0044260,GO:0043227,GO:0043231,GO:0006807,GO:0009058,GO:0034641,GO:1901576,GO:0044249,GO:0065007,GO:0050789,GO:1901360,GO:0006725,GO:0046483,GO:0003676,GO:0006139,GO:0050794,GO:0010467,GO:0009059,GO:…
GhGLK31	Ghir_A07G000240	1326	441	ChrA07: 247566-250527 -	48582	6.74	62.64	Nucleus	GO:0008150,GO:0003674,GO:0005575,GO:0008152,GO:0009987,GO:0005488,GO:0005623,GO:0071704,GO:0044464,GO:0044238,GO:0044237,GO:0005622,GO:0044424,GO:0043170,GO:0097159,GO:1901363,GO:0043226,GO:0043229,GO:0044260,GO:0043227,GO:0043231,GO:0006807,GO:0009058,GO:0034641,GO:1901576,GO:0044249,GO:0065007,GO:0050789,GO:1901360,GO:0006725,GO:0046483,GO:0003676,GO:0006139,GO:0050794,GO:0010467,GO:0009059,GO:…
GhGLK32	Ghir_A07G006640	1098	365	ChrA07: 8297518-8315411 +	40432.7	7.78	52.35	Nucleus	GO:0008150,GO:0003674,GO:0005575,GO:0008152,GO:0009987,GO:0005488,GO:0005623,GO:0071704,GO:0044464,GO:0044238,GO:0044237,GO:0005622,GO:0044424,GO:0043170,GO:0097159,GO:1901363,GO:0043226,GO:0043229,GO:0044260,GO:0043227,GO:0043231,GO:0006807,GO:0009058,GO:0034641,GO:1901576,GO:0044249,GO:0065007,GO:0050789,GO:1901360,GO:0006725,GO:0046483,GO:0003676,GO:0006139,GO:0050794,GO:0010467,GO:0009059,GO:…
GhGLK33	Ghir_A07G008710	714	237	ChrA07: 12017925-12019577 +	27523.5	7.66	47.73	Nucleus	GO:0008150,GO:0003674,GO:0005575,GO:0008152,GO:0009987,GO:0005488,GO:0005623,GO:0071704,GO:0044464,GO:0044238,GO:0044237,GO:0005622,GO:0044424,GO:0043170,GO:0097159,GO:1901363,GO:0043226,GO:0043229,GO:0044260,GO:0043227,GO:0043231,GO:0006807,GO:0009058,GO:0034641,GO:1901576,GO:0044249,GO:0065007,GO:0050789,GO:1901360,GO:0006725,GO:0046483,GO:0003676,GO:0006139,GO:0050794,GO:0010467,GO:0009059,GO:…
GhGLK34	Ghir_A07G010780	1014	337	ChrA07: 17479135-17484338 +	36451.2	5.28	42.47	Nucleus	GO:0008150,GO:0003674,GO:0003824,GO:0005575,GO:0016740,GO:0044699,GO:0006793,GO:0006796,GO:0005515,GO:0044763,GO:0016310,GO:0016772,GO:0016301,GO:0042802,GO:0050896,GO:0001071,GO:0003700,GO:0051716,GO:0007154,GO:0023052,GO:0044700,GO:0007165,GO:0035556,GO:0008152,GO:0009987,GO:0005488,GO:0000160,GO:0005623,GO:0071704,GO:0044464,GO:0044238,GO:0044237,GO:0005622,GO:0044424,GO:0043170,GO:0097159,GO:…
GhGLK35	Ghir_A07G019110	852	283	ChrA07: 81071418-81074127 +	31954.5	9.24	44.5	Nucleus	GO:0008150,GO:0003674,GO:0003824,GO:0005575,GO:0016740,GO:0044699,GO:0006793,GO:0006796,GO:0044763,GO:0016310,GO:0016772,GO:0016301,GO:0050896,GO:0051716,GO:0007154,GO:0023052,GO:0044700,GO:0007165,GO:0035556,GO:0008152,GO:0009987,GO:0005488,GO:0000160,GO:0005623,GO:0071704,GO:0044464,GO:0044238,GO:0044237,GO:0005622,GO:0044424,GO:0043170,GO:0097159,GO:1901363,GO:0043226,GO:0043229,GO:0044260,GO:…
GhGLK36	Ghir_A08G002190	1251	416	ChrA08: 2039875-2044009 -	46960.6	6.37	63.52	Nucleus	GO:0008150,GO:0003674,GO:0005575,GO:0008152,GO:0009987,GO:0005488,GO:0005623,GO:0071704,GO:0044464,GO:0044238,GO:0044237,GO:0005622,GO:0044424,GO:0043170,GO:0097159,GO:1901363,GO:0043226,GO:0043229,GO:0044260,GO:0043227,GO:0043231,GO:0006807,GO:0009058,GO:0034641,GO:1901576,GO:0044249,GO:0065007,GO:0050789,GO:1901360,GO:0006725,GO:0046483,GO:0003676,GO:0006139,GO:0050794,GO:0010467,GO:0009059,GO:…
GhGLK37	Ghir_A08G016030	837	278	ChrA08: 106265880-106268069 -	31503.3	9.14	31.66	Nucleus	GO:0008150,GO:0003674,GO:0005575,GO:0008152,GO:0009987,GO:0005488,GO:0005623,GO:0071704,GO:0044464,GO:0044238,GO:0044237,GO:0005622,GO:0044424,GO:0043170,GO:0097159,GO:1901363,GO:0043226,GO:0043229,GO:0044260,GO:0043227,GO:0043231,GO:0006807,GO:0009058,GO:0034641,GO:1901576,GO:0044249,GO:0065007,GO:0050789,GO:1901360,GO:0006725,GO:0046483,GO:0003676,GO:0006139,GO:0050794,GO:0010467,GO:0009059,GO:…
GhGLK38	Ghir_A08G016250	1119	372	ChrA08: 107060388-107065908 -	41779.5	8.93	60.41	Nucleus	GO:0008150,GO:0003674,GO:0005575,GO:0044699,GO:0044763,GO:0050896,GO:0051716,GO:0007154,GO:0023052,GO:0044700,GO:0007165,GO:0035556,GO:0008152,GO:0009987,GO:0005488,GO:0000160,GO:0005623,GO:0071704,GO:0044464,GO:0044238,GO:0044237,GO:0005622,GO:0044424,GO:0043170,GO:0097159,GO:1901363,GO:0043226,GO:0043229,GO:0044260,GO:0043227,GO:0043231,GO:0006807,GO:0009058,GO:0034641,GO:1901576,GO:0044249,GO:…
GhGLK39	Ghir_A08G016790	1662	553	ChrA08: 108136268-108142181 -	61865.8	6.19	45.07	Nucleus	GO:0008150,GO:0003674,GO:0005575,GO:0008152,GO:0009987,GO:0005488,GO:0005623,GO:0071704,GO:0044464,GO:0044238,GO:0044237,GO:0005622,GO:0044424,GO:0043170,GO:0097159,GO:1901363,GO:0043226,GO:0043229,GO:0044260,GO:0043227,GO:0043231,GO:0006807,GO:0009058,GO:0034641,GO:1901576,GO:0044249,GO:0065007,GO:0050789,GO:1901360,GO:0006725,GO:0046483,GO:0003676,GO:0006139,GO:0050794,GO:0010467,GO:0009059,GO:…
GhGLK40	Ghir_A08G021140	804	267	ChrA08: 116769265-116770889 -	30575.6	8.95	63.36	Nucleus	GO:0008150,GO:0003674,GO:0005575,GO:0008152,GO:0009987,GO:0005488,GO:0005623,GO:0071704,GO:0044464,GO:0044238,GO:0044237,GO:0005622,GO:0044424,GO:0043170,GO:0097159,GO:1901363,GO:0043226,GO:0043229,GO:0044260,GO:0043227,GO:0043231,GO:0006807,GO:0009058,GO:0034641,GO:1901576,GO:0044249,GO:0065007,GO:0050789,GO:1901360,GO:0006725,GO:0046483,GO:0003676,GO:0006139,GO:0050794,GO:0010467,GO:0009059,GO:…
GhGLK41	Ghir_A08G022250	1236	411	ChrA08: 118076268-118078541 -	46419.4	8.81	43.14	Nucleus	GO:0008150,GO:0003674,GO:0005575,GO:0008152,GO:0009987,GO:0005488,GO:0005623,GO:0071704,GO:0044464,GO:0044238,GO:0044237,GO:0005622,GO:0044424,GO:0043170,GO:0097159,GO:1901363,GO:0043226,GO:0043229,GO:0044260,GO:0043227,GO:0043231,GO:0006807,GO:0009058,GO:0034641,GO:1901576,GO:0044249,GO:0065007,GO:0050789,GO:1901360,GO:0006725,GO:0046483,GO:0003676,GO:0006139,GO:0050794,GO:0010467,GO:0009059,GO:…
GhGLK42	Ghir_A08G024340	1074	357	ChrA08: 120650722-120652881 -	39701	8.56	52.33	Nucleus	GO:0008150,GO:0003674,GO:0005575,GO:0008152,GO:0009987,GO:0005488,GO:0005623,GO:0071704,GO:0044464,GO:0044238,GO:0044237,GO:0005622,GO:0044424,GO:0043170,GO:0097159,GO:1901363,GO:0043226,GO:0043229,GO:0044260,GO:0043227,GO:0043231,GO:0006807,GO:0009058,GO:0034641,GO:1901576,GO:0044249,GO:0065007,GO:0050789,GO:1901360,GO:0006725,GO:0046483,GO:0003676,GO:0006139,GO:0050794,GO:0010467,GO:0009059,GO:…
GhGLK43	Ghir_A09G013590	948	315	ChrA09: 68289402-68297294 -	36353.8	8.1	66.03	Nucleus	GO:0008150,GO:0003674,GO:0005575,GO:0008152,GO:0009987,GO:0005488,GO:0005623,GO:0071704,GO:0044464,GO:0044238,GO:0044237,GO:0005622,GO:0044424,GO:0043170,GO:0097159,GO:1901363,GO:0043226,GO:0043229,GO:0044260,GO:0043227,GO:0043231,GO:0006807,GO:0009058,GO:0034641,GO:1901576,GO:0044249,GO:0065007,GO:0050789,GO:1901360,GO:0006725,GO:0046483,GO:0003676,GO:0006139,GO:0050794,GO:0010467,GO:0009059,GO:…
GhGLK44	Ghir_A09G017420	804	267	ChrA09: 7341090-73412624 +	29998.6	7.74	54.57	Nucleus	GO:0008150,GO:0044710,GO:0003674,GO:0005575,GO:0019538,GO:0044267,GO:0043412,GO:0006464,GO:0036211,GO:0044699,GO:0071840,GO:0016043,GO:0044763,GO:0006996,GO:0043933,GO:0032259,GO:0009628,GO:1902589,GO:0009892,GO:0048519,GO:0051276,GO:0018193,GO:0048523,GO:0050793,GO:0048583,GO:0010605,GO:0051239,GO:0006325,GO:2000026,GO:0009314,GO:0009416,GO:0031324,GO:0032501,GO:0044767,GO:0043414,GO:0016568,GO:…
GhGLK45	Ghir_A09G018220	1095	364	ChrA09: 74349745-74358468 -	40094.3	8.09	57.72	Nucleus	GO:0008150,GO:0003674,GO:0005575,GO:0044699,GO:0044763,GO:0050896,GO:0001071,GO:0003700,GO:0051716,GO:0007154,GO:0023052,GO:0044700,GO:0007165,GO:0035556,GO:0008152,GO:0009987,GO:0005488,GO:0000160,GO:0005623,GO:0071704,GO:0044464,GO:0044238,GO:0044237,GO:0005622,GO:0044424,GO:0043170,GO:0097159,GO:1901363,GO:0043226,GO:0043229,GO:0044260,GO:0043227,GO:0043231,GO:0006807,GO:0009058,GO:0034641,GO:…
GhGLK46	Ghir_A09G021400	762	253	ChrA09: 77750621-77754687 +	27983.7	5.73	46.5	Chloroplast\Nucleus	GO:0008150,GO:0003674,GO:0005575,GO:0044699,GO:0044763,GO:0050896,GO:0001071,GO:0003700,GO:0051716,GO:0007154,GO:0023052,GO:0044700,GO:0007165,GO:0035556,GO:0008152,GO:0009987,GO:0005488,GO:0000160,GO:0005623,GO:0071704,GO:0044464,GO:0044238,GO:0044237,GO:0005622,GO:0044424,GO:0043170,GO:0097159,GO:1901363,GO:0043226,GO:0043229,GO:0044260,GO:0043227,GO:0043231,GO:0006807,GO:0009058,GO:0034641,GO:…
GhGLK47	Ghir_A09G024980	2019	672	ChrA09: 80808370-80813685 -	74057.4	5.96	46.31	Nucleus	GO:0008150,GO:0003674,GO:0005575,GO:0008152,GO:0009987,GO:0005488,GO:0005623,GO:0071704,GO:0044464,GO:0044238,GO:0044237,GO:0005622,GO:0044424,GO:0043170,GO:0097159,GO:1901363,GO:0043226,GO:0043229,GO:0044260,GO:0043227,GO:0043231,GO:0006807,GO:0009058,GO:0034641,GO:1901576,GO:0044249,GO:0065007,GO:0050789,GO:1901360,GO:0006725,GO:0046483,GO:0003676,GO:0006139,GO:0050794,GO:0010467,GO:0009059,GO:…
GhGLK48	Ghir_A10G003360	1047	348	ChrA10: 2940769-2946013 +	40213.7	7.29	57.5	Nucleus	GO:0008150,GO:0003674,GO:0005575,GO:0008152,GO:0009987,GO:0005488,GO:0005623,GO:0071704,GO:0044464,GO:0044238,GO:0044237,GO:0005622,GO:0044424,GO:0043170,GO:0097159,GO:1901363,GO:0043226,GO:0043229,GO:0044260,GO:0043227,GO:0043231,GO:0006807,GO:0009058,GO:0034641,GO:1901576,GO:0044249,GO:0065007,GO:0050789,GO:1901360,GO:0006725,GO:0046483,GO:0003676,GO:0006139,GO:0050794,GO:0010467,GO:0009059,GO:…
GhGLK49	Ghir_A10G012620	909	302	ChrA10: 65641282-65645669 +	33070.4	5.92	54.2	Nucleus	GO:0008150,GO:0003674,GO:0005575,GO:0008152,GO:0009987,GO:0005488,GO:0005623,GO:0071704,GO:0044464,GO:0044238,GO:0044237,GO:0005622,GO:0044424,GO:0043170,GO:0097159,GO:1901363,GO:0043226,GO:0043229,GO:0044260,GO:0043227,GO:0043231,GO:0006807,GO:0009058,GO:0034641,GO:1901576,GO:0044249,GO:0065007,GO:0050789,GO:1901360,GO:0006725,GO:0046483,GO:0003676,GO:0006139,GO:0050794,GO:0010467,GO:0009059,GO:…
GhGLK50	Ghir_A10G017290	1950	649	ChrA10: 96077267-96080245 -	71014.8	5.84	49.29	Nucleus	GO:0008150,GO:0003674,GO:0005575,GO:0044699,GO:0071944,GO:0005618,GO:0030312,GO:0032501,GO:0044767,GO:0044707,GO:0007275,GO:0032502,GO:0009888,GO:0044702,GO:0048856,GO:0000975,GO:0001067,GO:0044212,GO:0048731,GO:0000003,GO:0022414,GO:0009791,GO:0003006,GO:0099402,GO:0048367,GO:0048608,GO:0061458,GO:0090567,GO:0048827,GO:0009908,GO:0080060,GO:0048437,GO:0048438,GO:0048467,GO:0048440,GO:0035670,GO:…
GhGLK51	Ghir_A10G024300	960	319	ChrA10: 114256184-114258437 +	35970.1	7.7	52.68	Nucleus	GO:0008150,GO:0003674,GO:0005575,GO:0008152,GO:0009987,GO:0005488,GO:0005623,GO:0071704,GO:0044464,GO:0044238,GO:0044237,GO:0005622,GO:0044424,GO:0043170,GO:0097159,GO:1901363,GO:0043226,GO:0043229,GO:0044260,GO:0043227,GO:0043231,GO:0006807,GO:0009058,GO:0034641,GO:1901576,GO:0044249,GO:0065007,GO:0050789,GO:1901360,GO:0006725,GO:0046483,GO:0003676,GO:0006139,GO:0050794,GO:0010467,GO:0009059,GO:…
GhGLK52	Ghir_A11G005170	1041	346	ChrA11: 4419311-4421507 +	38980.1	6.08	57.47	Nucleus	GO:0008150,GO:0003674,GO:0005575,GO:0044699,GO:0032501,GO:0044767,GO:0044707,GO:0007275,GO:0032502,GO:0044702,GO:0048856,GO:0048731,GO:0000003,GO:0022414,GO:0009791,GO:0003006,GO:0099402,GO:0048367,GO:0048608,GO:0061458,GO:0090567,GO:0048827,GO:0009908,GO:0048437,GO:0048438,GO:0048467,GO:0048440,GO:0035670,GO:0048481,GO:0008152,GO:0009987,GO:0005488,GO:0005623,GO:0071704,GO:0044464,GO:0044238,GO:…
GhGLK53	Ghir_A11G012040	1263	420	ChrA11: 12074524-12076338 -	46973.4	5.39	45.12	Nucleus	GO:0008150,GO:0003674,GO:0005575,GO:0008152,GO:0009987,GO:0005488,GO:0005623,GO:0071704,GO:0044464,GO:0044238,GO:0044237,GO:0005622,GO:0044424,GO:0043170,GO:0097159,GO:1901363,GO:0043226,GO:0043229,GO:0044260,GO:0043227,GO:0043231,GO:0006807,GO:0009058,GO:0034641,GO:1901576,GO:0044249,GO:0065007,GO:0050789,GO:1901360,GO:0006725,GO:0046483,GO:0003676,GO:0006139,GO:0050794,GO:0010467,GO:0009059,GO:…
GhGLK54	Ghir_A11G014130	1416	471	ChrA11: 15538310-15541558 -	52052.1	5.85	60.36	Nucleus	GO:0008150,GO:0003674,GO:0005575,GO:0008152,GO:0009987,GO:0005488,GO:0005623,GO:0071704,GO:0044464,GO:0044238,GO:0044237,GO:0005622,GO:0044424,GO:0043170,GO:0097159,GO:1901363,GO:0043226,GO:0043229,GO:0044260,GO:0043227,GO:0043231,GO:0006807,GO:0009058,GO:0034641,GO:1901576,GO:0044249,GO:0065007,GO:0050789,GO:1901360,GO:0006725,GO:0046483,GO:0003676,GO:0006139,GO:0050794,GO:0010467,GO:0009059,GO:…
GhGLK55	Ghir_A11G026660	1302	433	ChrA11: 105761580-105765771 +	47835.4	5.68	52.38	Nucleus	GO:0008150,GO:0003674,GO:0005575,GO:0008152,GO:0009987,GO:0005488,GO:0005623,GO:0071704,GO:0044464,GO:0044238,GO:0044237,GO:0005622,GO:0044424,GO:0043170,GO:0097159,GO:1901363,GO:0043226,GO:0043229,GO:0044260,GO:0043227,GO:0043231,GO:0006807,GO:0009058,GO:0034641,GO:1901576,GO:0044249,GO:0065007,GO:0050789,GO:1901360,GO:0006725,GO:0046483,GO:0003676,GO:0006139,GO:0050794,GO:0010467,GO:0009059,GO:…
GhGLK56	Ghir_A11G027870	1164	387	ChrA11: 109443124-109445536 +	43196.6	6.4	44.2	Nucleus	GO:0008150,GO:0003674,GO:0005575,GO:0008152,GO:0009987,GO:0005488,GO:0005623,GO:0071704,GO:0044464,GO:0044238,GO:0044237,GO:0005622,GO:0044424,GO:0043170,GO:0097159,GO:1901363,GO:0043226,GO:0043229,GO:0044260,GO:0043227,GO:0043231,GO:0006807,GO:0009058,GO:0034641,GO:1901576,GO:0044249,GO:0065007,GO:0050789,GO:1901360,GO:0006725,GO:0046483,GO:0003676,GO:0006139,GO:0050794,GO:0010467,GO:0009059,GO:…
GhGLK57	Ghir_A11G033390	876	291	ChrA11: 119881923-119884369 -	31655.6	6.85	60.57	Nucleus	GO:0008150,GO:0003674,GO:0005575,GO:0044699,GO:0044763,GO:0050896,GO:0001071,GO:0003700,GO:0051716,GO:0007154,GO:0023052,GO:0044700,GO:0007165,GO:0035556,GO:0008152,GO:0009987,GO:0005488,GO:0000160,GO:0005623,GO:0071704,GO:0044464,GO:0044238,GO:0044237,GO:0005622,GO:0044424,GO:0043170,GO:0097159,GO:1901363,GO:0043226,GO:0043229,GO:0044260,GO:0043227,GO:0043231,GO:0006807,GO:0009058,GO:0034641,GO:…
GhGLK58	Ghir_A11G033400	852	283	ChrA11: 119882864-119883841 -	30671.5	7.07	60.9	Nucleus
GhGLK59	Ghir_A12G007280	1152	383	ChrA12: 18761469-18764009 +	43386.7	9.01	48.49	Nucleus
GhGLK60	Ghir_A12G018010	1140	379	ChrA12: 94329851-94332422 -	41985.3	6.29	43.56	Nucleus	GO:0008150,GO:0003674,GO:0005575,GO:0008152,GO:0009987,GO:0005488,GO:0005623,GO:0071704,GO:0044464,GO:0044238,GO:0044237,GO:0005622,GO:0044424,GO:0043170,GO:0097159,GO:1901363,GO:0043226,GO:0043229,GO:0044260,GO:0043227,GO:0043231,GO:0006807,GO:0009058,GO:0034641,GO:1901576,GO:0044249,GO:0065007,GO:0050789,GO:1901360,GO:0006725,GO:0046483,GO:0003676,GO:0006139,GO:0050794,GO:0010467,GO:0009059,GO:…
GhGLK61	Ghir_A12G021670	711	236	ChrA12: 100383883-100385846 -	26731	8.31	30.96	Nucleus	GO:0008150,GO:0003674,GO:0005575,GO:0008152,GO:0009987,GO:0005488,GO:0005623,GO:0071704,GO:0044464,GO:0044238,GO:0044237,GO:0005622,GO:0044424,GO:0043170,GO:0097159,GO:1901363,GO:0043226,GO:0043229,GO:0044260,GO:0043227,GO:0043231,GO:0006807,GO:0009058,GO:0034641,GO:1901576,GO:0044249,GO:0065007,GO:0050789,GO:1901360,GO:0006725,GO:0046483,GO:0003676,GO:0006139,GO:0050794,GO:0010467,GO:0009059,GO:…
GhGLK62	Ghir_A12G021910	906	301	ChrA12: 100625357-100630777 -	33647.6	9.57	62.24	Nucleus	GO:0008150,GO:0003674,GO:0005575,GO:0044699,GO:0044763,GO:0050896,GO:0051716,GO:0007154,GO:0023052,GO:0044700,GO:0007165,GO:0035556,GO:0008152,GO:0009987,GO:0005488,GO:0000160,GO:0005623,GO:0071704,GO:0044464,GO:0044238,GO:0044237,GO:0005622,GO:0044424,GO:0043170,GO:0097159,GO:1901363,GO:0043226,GO:0043229,GO:0044260,GO:0043227,GO:0043231,GO:0006807,GO:0009058,GO:0034641,GO:1901576,GO:0044249,GO:…
GhGLK63	Ghir_A12G022390	1695	564	ChrA12: 101180107-101185889 -	62317.2	6.07	45.33	Nucleus	GO:0008150,GO:0003674,GO:0005575,GO:0008152,GO:0009987,GO:0005488,GO:0005623,GO:0071704,GO:0044464,GO:0044238,GO:0044237,GO:0005622,GO:0044424,GO:0043170,GO:0097159,GO:1901363,GO:0043226,GO:0043229,GO:0044260,GO:0043227,GO:0043231,GO:0006807,GO:0009058,GO:0034641,GO:1901576,GO:0044249,GO:0065007,GO:0050789,GO:1901360,GO:0006725,GO:0046483,GO:0003676,GO:0006139,GO:0050794,GO:0010467,GO:0009059,GO:…
GhGLK64	Ghir_A12G027410	2352	783	ChrA12: 106049399-106053767 -	83957.2	5.68	43.28	Nucleus	GO:0008150,GO:0003674,GO:0005575,GO:0008152,GO:0009987,GO:0005488,GO:0005623,GO:0071704,GO:0044464,GO:0044238,GO:0044237,GO:0005622,GO:0044424,GO:0043170,GO:0097159,GO:1901363,GO:0043226,GO:0043229,GO:0044260,GO:0043227,GO:0043231,GO:0006807,GO:0009058,GO:0034641,GO:1901576,GO:0044249,GO:0065007,GO:0050789,GO:1901360,GO:0006725,GO:0046483,GO:0003676,GO:0006139,GO:0050794,GO:0010467,GO:0009059,GO:…
GhGLK65	Ghir_A12G028440	1122	373	ChrA12: 107144089-107149803 +	40572	6.12	50.69	Nucleus	GO:0008150,GO:0003674,GO:0003824,GO:0005575,GO:0016740,GO:0044699,GO:0006793,GO:0006796,GO:0005515,GO:0044763,GO:0016310,GO:0016772,GO:0016301,GO:0042802,GO:0050896,GO:0001071,GO:0003700,GO:0051716,GO:0007154,GO:0023052,GO:0044700,GO:0007165,GO:0035556,GO:0008152,GO:0009987,GO:0005488,GO:0000160,GO:0005623,GO:0071704,GO:0044464,GO:0044238,GO:0044237,GO:0005622,GO:0044424,GO:0043170,GO:0097159,GO:…
GhGLK66	Ghir_A13G003540	1227	408	ChrA13: 4287737-4290725 +	45499	7.12	65.05	Nucleus	GO:0008150,GO:0003674,GO:0003824,GO:0005575,GO:0016740,GO:0044699,GO:0006793,GO:0006796,GO:0044763,GO:0016310,GO:0016772,GO:0016301,GO:0050896,GO:0051716,GO:0007154,GO:0023052,GO:0044700,GO:0007165,GO:0035556,GO:0008152,GO:0009987,GO:0005488,GO:0000160,GO:0005623,GO:0071704,GO:0044464,GO:0044238,GO:0044237,GO:0005622,GO:0044424,GO:0043170,GO:0097159,GO:1901363,GO:0043226,GO:0043229,GO:0044260,GO:…
GhGLK67	Ghir_A13G005200	975	324	ChrA13: 9515483-9517467 +	36145.3	8.33	64.16	Nucleus
GhGLK68	Ghir_A13G007590	690	229	ChrA13: 20160164-20162905 -	24970.4	5.88	51.29	Nucleus
GhGLK69	Ghir_A13G013190	1098	365	ChrA13: 87229764-87231947 -	40436.8	8.21	58.77	Nucleus	GO:0008150,GO:0003674,GO:0005575,GO:0044699,GO:0032501,GO:0044767,GO:0044707,GO:0007275,GO:0032502,GO:0044702,GO:0048856,GO:0048731,GO:0000003,GO:0022414,GO:0009791,GO:0007389,GO:0003002,GO:0003006,GO:0099402,GO:0048367,GO:0048608,GO:0061458,GO:0090567,GO:0048827,GO:0009908,GO:0009798,GO:0009955,GO:0009943,GO:0009944,GO:0065001,GO:0048437,GO:0048438,GO:0048467,GO:0048440,GO:0035670,GO:0048481,GO:…
GhGLK70	Ghir_A13G019360	1842	613	ChrA13: 102577964-102581694 -	66632.2	6.6	37.22	Nucleus	GO:0008150,GO:0003674,GO:0005575,GO:0044699,GO:0044763,GO:0050896,GO:0051716,GO:0007154,GO:0023052,GO:0044700,GO:0007165,GO:0035556,GO:0008152,GO:0009987,GO:0005488,GO:0000160,GO:0005623,GO:0071704,GO:0044464,GO:0044238,GO:0044237,GO:0005622,GO:0044424,GO:0043170,GO:0097159,GO:1901363,GO:0043226,GO:0043229,GO:0044260,GO:0043227,GO:0043231,GO:0006807,GO:0009058,GO:0034641,GO:1901576,GO:0044249,GO:…
GhGLK71	Ghir_D01G002850	2031	676	ChrD01: 2342933-2346995 +	74329.4	5.71	47.44	Nucleus	GO:0008150,GO:0008152,GO:0009987,GO:0071704,GO:0044238,GO:0044237,GO:0043170,GO:0044260,GO:0006807,GO:0009058,GO:0034641,GO:1901576,GO:0044249,GO:1901360,GO:0006725,GO:0046483,GO:0006139,GO:0010467,GO:0009059,GO:0044271,GO:0034645,GO:0090304,GO:0016070,GO:1901362,GO:0018130,GO:0019438,GO:0034654,GO:0032774,GO:0097659,GO:0006351
GhGLK72	Ghir_D01G015000	957	318	ChrD01: 41192930 -41197170 +	35473.5	6.59	57.42	Nucleus	GO:0008150,GO:0003674,GO:0005575,GO:0008152,GO:0009987,GO:0005488,GO:0005623,GO:0071704,GO:0044464,GO:0044238,GO:0044237,GO:0005622,GO:0044424,GO:0043170,GO:0097159,GO:1901363,GO:0043226,GO:0043229,GO:0044260,GO:0043227,GO:0043231,GO:0006807,GO:0009058,GO:0034641,GO:1901576,GO:0044249,GO:0065007,GO:0050789,GO:1901360,GO:0006725,GO:0046483,GO:0003676,GO:0006139,GO:0050794,GO:0010467,GO:0009059,GO:…
GhGLK73	Ghir_D01G019570	1152	383	ChrD01: 57609740-57613698 +	42593.6	6.82	55.41	Nucleus	GO:0008150,GO:0003674,GO:0005575,GO:0008152,GO:0009987,GO:0005488,GO:0005623,GO:0071704,GO:0044464,GO:0044238,GO:0044237,GO:0005622,GO:0044424,GO:0043170,GO:0097159,GO:1901363,GO:0043226,GO:0043229,GO:0044260,GO:0043227,GO:0043231,GO:0006807,GO:0009058,GO:0034641,GO:1901576,GO:0044249,GO:0065007,GO:0050789,GO:1901360,GO:0006725,GO:0046483,GO:0003676,GO:0006139,GO:0050794,GO:0010467,GO:0009059,GO:…
GhGLK74	Ghir_D01G020550	939	312	ChrD01: 59295033-59299137 -	33778.6	6.5	65.6	Nucleus	GO:0008150,GO:0003674,GO:0005575,GO:0044699,GO:0044763,GO:0050896,GO:0001071,GO:0003700,GO:0051716,GO:0007154,GO:0023052,GO:0044700,GO:0007165,GO:0035556,GO:0008152,GO:0009987,GO:0005488,GO:0000160,GO:0005623,GO:0071704,GO:0044464,GO:0044238,GO:0044237,GO:0005622,GO:0044424,GO:0043170,GO:0097159,GO:1901363,GO:0043226,GO:0043229,GO:0044260,GO:0043227,GO:0043231,GO:0006807,GO:0009058,GO:0034641,GO:…
GhGLK75	Ghir_D01G023840	1002	333	ChrD01: 63037228-63039324 -	37844	8.53	56.83	Nucleus	GO:0008150,GO:0003674,GO:0005575,GO:0044699,GO:0044763,GO:0050896,GO:0001071,GO:0003700,GO:0051716,GO:0007154,GO:0023052,GO:0044700,GO:0007165,GO:0035556,GO:0008152,GO:0009987,GO:0005488,GO:0000160,GO:0005623,GO:0071704,GO:0044464,GO:0044238,GO:0044237,GO:0005622,GO:0044424,GO:0043170,GO:0097159,GO:1901363,GO:0043226,GO:0043229,GO:0044260,GO:0043227,GO:0043231,GO:0006807,GO:0009058,GO:0034641,GO:…
GhGLK76	Ghir_D02G002920	1104	367	ChrD02: 3879134-3882539 -	40677.2	7.05	55.09	Chloroplast\Nucleus	GO:0008150,GO:0003674,GO:0005575,GO:0008152,GO:0009987,GO:0005488,GO:0005623,GO:0071704,GO:0044464,GO:0044238,GO:0044237,GO:0005622,GO:0044424,GO:0043170,GO:0097159,GO:1901363,GO:0043226,GO:0043229,GO:0044260,GO:0043227,GO:0043231,GO:0006807,GO:0009058,GO:0034641,GO:1901576,GO:0044249,GO:0065007,GO:0050789,GO:1901360,GO:0006725,GO:0046483,GO:0003676,GO:0006139,GO:0050794,GO:0010467,GO:0009059,GO:…
GhGLK77	Ghir_D02G012990	1095	364	ChrD02: 43294292-43299180 -	40435.7	6.42	48.8	Nucleus	GO:0008150,GO:0003674,GO:0005575,GO:0008152,GO:0009987,GO:0005488,GO:0005623,GO:0071704,GO:0044464,GO:0044238,GO:0044237,GO:0005622,GO:0044424,GO:0043170,GO:0097159,GO:1901363,GO:0043226,GO:0043229,GO:0044260,GO:0043227,GO:0043231,GO:0006807,GO:0009058,GO:0034641,GO:1901576,GO:0044249,GO:0065007,GO:0050789,GO:1901360,GO:0006725,GO:0046483,GO:0003676,GO:0006139,GO:0050794,GO:0010467,GO:0009059,GO:…
GhGLK78	Ghir_D02G014470	2010	669	ChrD02: 50063331-50069444 +	72622.7	6.45	54.4	Nucleus	GO:0008150,GO:0003674,GO:0005575,GO:0008152,GO:0009987,GO:0005488,GO:0005623,GO:0071704,GO:0044464,GO:0044238,GO:0044237,GO:0005622,GO:0044424,GO:0043170,GO:0097159,GO:1901363,GO:0043226,GO:0043229,GO:0044260,GO:0043227,GO:0043231,GO:0006807,GO:0009058,GO:0034641,GO:1901576,GO:0044249,GO:0065007,GO:0050789,GO:1901360,GO:0006725,GO:0046483,GO:0003676,GO:0006139,GO:0050794,GO:0010467,GO:0009059,GO:…
GhGLK79	Ghir_D02G015960	1722	573	ChrD02: 55705049-55708692 -	64292.7	5.12	41.69	Nucleus	GO:0008150,GO:0003674,GO:0005575,GO:0008152,GO:0009987,GO:0005488,GO:0005623,GO:0071704,GO:0044464,GO:0044238,GO:0044237,GO:0005622,GO:0044424,GO:0043170,GO:0097159,GO:1901363,GO:0043226,GO:0043229,GO:0044260,GO:0043227,GO:0043231,GO:0006807,GO:0009058,GO:0034641,GO:1901576,GO:0044249,GO:0065007,GO:0050789,GO:1901360,GO:0006725,GO:0046483,GO:0003676,GO:0006139,GO:0050794,GO:0010467,GO:0009059,GO:…
GhGLK80	Ghir_D03G002070	1104	367	ChrD03: 1768616-1770817 +	41826.1	6.19	54.18	Nucleus	GO:0008150,GO:0003674,GO:0003824,GO:0005575,GO:0016740,GO:0044699,GO:0006793,GO:0006796,GO:0044763,GO:0016310,GO:0016772,GO:0016301,GO:0050896,GO:0001071,GO:0003700,GO:0051716,GO:0007154,GO:0023052,GO:0044700,GO:0007165,GO:0035556,GO:0008152,GO:0009987,GO:0005488,GO:0000160,GO:0005623,GO:0071704,GO:0044464,GO:0044238,GO:0044237,GO:0005622,GO:0044424,GO:0043170,GO:0097159,GO:1901363,GO:0043226,GO:…
GhGLK81	Ghir_D03G013420	1053	350	ChrD03: 44089709-44092641 -	37599.7	5.28	44.19	Nucleus	GO:0008150,GO:0003674,GO:0005575,GO:0008152,GO:0009987,GO:0005488,GO:0005623,GO:0071704,GO:0044464,GO:0044238,GO:0044237,GO:0005622,GO:0044424,GO:0043170,GO:0097159,GO:1901363,GO:0043226,GO:0043229,GO:0044260,GO:0043227,GO:0043231,GO:0006807,GO:0009058,GO:0034641,GO:1901576,GO:0044249,GO:0065007,GO:0050789,GO:1901360,GO:0006725,GO:0046483,GO:0003676,GO:0006139,GO:0050794,GO:0010467,GO:0009059,GO:…
GhGLK82	Ghir_D03G018380	1614	537	ChrD03: 52051267-52056747 +	60023.3	5.53	50.56	Nucleus	GO:0008150,GO:0003674,GO:0005575,GO:0008152,GO:0009987,GO:0005488,GO:0005623,GO:0071704,GO:0044464,GO:0044238,GO:0044237,GO:0005622,GO:0044424,GO:0043170,GO:0097159,GO:1901363,GO:0043226,GO:0043229,GO:0044260,GO:0043227,GO:0043231,GO:0006807,GO:0009058,GO:0034641,GO:1901576,GO:0044249,GO:0065007,GO:0050789,GO:1901360,GO:0006725,GO:0046483,GO:0003676,GO:0006139,GO:0050794,GO:0010467,GO:0009059,GO:…
GhGLK83	Ghir_D04G014450	1056	351	ChrD04: 47503619-47506089 -	39758	7.77	57.42	Nucleus	GO:0008150,GO:0003674,GO:0005575,GO:0008152,GO:0009987,GO:0005488,GO:0005623,GO:0071704,GO:0044464,GO:0044238,GO:0044237,GO:0005622,GO:0044424,GO:0043170,GO:0097159,GO:1901363,GO:0043226,GO:0043229,GO:0044260,GO:0043227,GO:0043231,GO:0006807,GO:0009058,GO:0034641,GO:1901576,GO:0044249,GO:0065007,GO:0050789,GO:1901360,GO:0006725,GO:0046483,GO:0003676,GO:0006139,GO:0050794,GO:0010467,GO:0009059,GO:…
GhGLK84	Ghir_D04G015260	1320	439	ChrD04: 49478380-49481316 +	48444.4	6.39	60.48	Nucleus	GO:0008150,GO:0003674,GO:0003824,GO:0005575,GO:0016740,GO:0044699,GO:0006793,GO:0006796,GO:0044763,GO:0016310,GO:0016772,GO:0016301,GO:0050896,GO:0001071,GO:0003700,GO:0051716,GO:0007154,GO:0023052,GO:0044700,GO:0007165,GO:0035556,GO:0008152,GO:0009987,GO:0005488,GO:0000160,GO:0005623,GO:0071704,GO:0044464,GO:0044238,GO:0044237,GO:0005622,GO:0044424,GO:0043170,GO:0097159,GO:1901363,GO:0043226,GO:…
GhGLK85	Ghir_D04G017510	1179	392	ChrD04: 52886388-52888825 -	44275.8	9.06	60.65	Nucleus	GO:0008150,GO:0003674,GO:0005575,GO:0008152,GO:0009987,GO:0005488,GO:0005623,GO:0071704,GO:0044464,GO:0044238,GO:0044237,GO:0005622,GO:0044424,GO:0043170,GO:0097159,GO:1901363,GO:0043226,GO:0043229,GO:0044260,GO:0043227,GO:0043231,GO:0006807,GO:0009058,GO:0034641,GO:1901576,GO:0044249,GO:0065007,GO:0050789,GO:1901360,GO:0006725,GO:0046483,GO:0003676,GO:0006139,GO:0050794,GO:0010467,GO:0009059,GO:…
GhGLK86	Ghir_D04G020780	780	259	ChrD04: 56337076-56339001 +	28772.5	7.63	61.48	Nucleus	GO:0008150,GO:0003674,GO:0005575,GO:0008152,GO:0009987,GO:0005488,GO:0005623,GO:0071704,GO:0044464,GO:0044238,GO:0044237,GO:0005622,GO:0044424,GO:0043170,GO:0097159,GO:1901363,GO:0043226,GO:0043229,GO:0044260,GO:0043227,GO:0043231,GO:0006807,GO:0009058,GO:0034641,GO:1901576,GO:0044249,GO:0065007,GO:0050789,GO:1901360,GO:0006725,GO:0046483,GO:0003676,GO:0006139,GO:0050794,GO:0010467,GO:0009059,GO:…
GhGLK87	Ghir_D05G000140	1011	336	ChrD05: 94945-95987 -	36262.3	5.46	36.1	Nucleus	GO:0008150,GO:0008152,GO:0009987,GO:0071704,GO:0044238,GO:0044237,GO:0043170,GO:0044260,GO:0006807,GO:0009058,GO:0034641,GO:1901576,GO:0044249,GO:0065007,GO:0050789,GO:1901360,GO:0006725,GO:0046483,GO:0006139,GO:0050794,GO:0010467,GO:0009059,GO:0044271,GO:0034645,GO:0090304,GO:0016070,GO:1901362,GO:0018130,GO:0019438,GO:0034654,GO:0032774,GO:0097659,GO:0006351
GhGLK88	Ghir_D05G002300	1416	471	ChrD05: 1968575-1971073 -	50988.6	6.47	55.64	Nucleus	GO:0008150,GO:0003674,GO:0005575,GO:0008152,GO:0009987,GO:0005488,GO:0005623,GO:0071704,GO:0044464,GO:0044238,GO:0044237,GO:0005622,GO:0044424,GO:0043170,GO:0097159,GO:1901363,GO:0043226,GO:0043229,GO:0044260,GO:0043227,GO:0043231,GO:0006807,GO:0009058,GO:0034641,GO:1901576,GO:0044249,GO:0065007,GO:0050789,GO:1901360,GO:0006725,GO:0046483,GO:0003676,GO:0006139,GO:0050794,GO:0010467,GO:0009059,GO:…
GhGLK89	Ghir_D05G005390	2097	698	ChrD05: 4402310-4406136 +	76299.7	5.53	36.67	Nucleus	GO:0008150,GO:0003674,GO:0005575,GO:0008152,GO:0009987,GO:0005488,GO:0005623,GO:0071704,GO:0044464,GO:0044238,GO:0044237,GO:0005622,GO:0044424,GO:0043170,GO:0097159,GO:1901363,GO:0043226,GO:0043229,GO:0044260,GO:0043227,GO:0043231,GO:0006807,GO:0009058,GO:0034641,GO:1901576,GO:0044249,GO:0065007,GO:0050789,GO:1901360,GO:0006725,GO:0046483,GO:0003676,GO:0006139,GO:0050794,GO:0010467,GO:0009059,GO:…
GhGLK90	Ghir_D05G006070	1980	659	ChrD05: 4905635-4909829 +	72339.6	5.6	41.34	Nucleus	GO:0008150,GO:0003674,GO:0005575,GO:0008152,GO:0009987,GO:0005488,GO:0005623,GO:0071704,GO:0044464,GO:0044238,GO:0044237,GO:0005622,GO:0044424,GO:0043170,GO:0097159,GO:1901363,GO:0043226,GO:0043229,GO:0044260,GO:0043227,GO:0043231,GO:0006807,GO:0009058,GO:0034641,GO:1901576,GO:0044249,GO:0065007,GO:0050789,GO:1901360,GO:0006725,GO:0046483,GO:0003676,GO:0006139,GO:0050794,GO:0010467,GO:0009059,GO:…
GhGLK91	Ghir_D05G010780	1074	357	ChrD05: 9075351-9077676 -	40525.1	9.22	58.52	Nucleus	GO:0008150,GO:0003674,GO:0005575,GO:0008152,GO:0009987,GO:0005488,GO:0005623,GO:0071704,GO:0044464,GO:0044238,GO:0044237,GO:0005622,GO:0044424,GO:0043170,GO:0097159,GO:1901363,GO:0043226,GO:0043229,GO:0044260,GO:0043227,GO:0043231,GO:0006807,GO:0009058,GO:0034641,GO:1901576,GO:0044249,GO:0065007,GO:0050789,GO:1901360,GO:0006725,GO:0046483,GO:0003676,GO:0006139,GO:0050794,GO:0010467,GO:0009059,GO:…
GhGLK92	Ghir_D05G011700	1482	493	ChrD05: 989301-9896797 +	54120.8	6.07	58.65	Nucleus	GO:0008150,GO:0003674,GO:0005575,GO:0008152,GO:0009987,GO:0005488,GO:0005623,GO:0071704,GO:0044464,GO:0044238,GO:0044237,GO:0005622,GO:0044424,GO:0043170,GO:0097159,GO:1901363,GO:0043226,GO:0043229,GO:0044260,GO:0043227,GO:0043231,GO:0006807,GO:0009058,GO:0034641,GO:1901576,GO:0044249,GO:0065007,GO:0050789,GO:1901360,GO:0006725,GO:0046483,GO:0003676,GO:0006139,GO:0050794,GO:0010467,GO:0009059,GO:…
GhGLK93	Ghir_D05G015730	912	303	ChrD05: 13699145-13700535 +	34418.5	6.61	60.77	Nucleus	GO:0008150,GO:0003674,GO:0005575,GO:0008152,GO:0009987,GO:0005488,GO:0005623,GO:0071704,GO:0044464,GO:0044238,GO:0044237,GO:0005622,GO:0044424,GO:0043170,GO:0097159,GO:1901363,GO:0043226,GO:0043229,GO:0044260,GO:0043227,GO:0043231,GO:0006807,GO:0009058,GO:0034641,GO:1901576,GO:0044249,GO:0065007,GO:0050789,GO:1901360,GO:0006725,GO:0046483,GO:0003676,GO:0006139,GO:0050794,GO:0010467,GO:0009059,GO:…
GhGLK94	Ghir_D05G020280	996	331	ChrD05: 17636027-17639314 -	36791.3	8.95	43.08	Nucleus	GO:0008150,GO:0003674,GO:0005575,GO:0008152,GO:0009987,GO:0005488,GO:0005623,GO:0071704,GO:0044464,GO:0044238,GO:0044237,GO:0005622,GO:0044424,GO:0043170,GO:0097159,GO:1901363,GO:0043226,GO:0043229,GO:0044260,GO:0043227,GO:0043231,GO:0006807,GO:0009058,GO:0034641,GO:1901576,GO:0044249,GO:0065007,GO:0050789,GO:1901360,GO:0006725,GO:0046483,GO:0003676,GO:0006139,GO:0050794,GO:0010467,GO:0009059,GO:…
GhGLK95	Ghir_D05G031730	558	185	ChrD05: 36454181-36457396 +	20631	9.32	75.05	Nucleus	GO:0008150,GO:0003674,GO:0005575,GO:0008152,GO:0009987,GO:0005488,GO:0005623,GO:0071704,GO:0044464,GO:0044238,GO:0044237,GO:0005622,GO:0044424,GO:0043170,GO:0097159,GO:1901363,GO:0043226,GO:0043229,GO:0044260,GO:0043227,GO:0043231,GO:0006807,GO:0009058,GO:0034641,GO:1901576,GO:0044249,GO:0065007,GO:0050789,GO:1901360,GO:0006725,GO:0046483,GO:0003676,GO:0006139,GO:0050794,GO:0010467,GO:0009059,GO:…
GhGLK96	Ghir_D06G001240	825	274	ChrD06: 1368714-1371639 -	30479.3	8.97	36.86	Nucleus	GO:0008150,GO:0003674,GO:0005575,GO:0044699,GO:0032501,GO:0044767,GO:0044707,GO:0007275,GO:0032502,GO:0044702,GO:0048856,GO:0048731,GO:0000003,GO:0022414,GO:0009791,GO:0007389,GO:0003002,GO:0003006,GO:0099402,GO:0048367,GO:0048608,GO:0061458,GO:0090567,GO:0048827,GO:0009908,GO:0009798,GO:0009955,GO:0009943,GO:0009944,GO:0065001,GO:0048437,GO:0048438,GO:0048467,GO:0048440,GO:0035670,GO:0048481,GO:…
GhGLK97	Ghir_D06G016900	882	293	ChrD06: 56945819-56947612 +	33305.1	9.43	63.63	Nucleus	GO:0008150,GO:0003674,GO:0005575,GO:0044699,GO:0044763,GO:0050896,GO:0051716,GO:0007154,GO:0023052,GO:0044700,GO:0007165,GO:0035556,GO:0008152,GO:0009987,GO:0005488,GO:0000160,GO:0005623,GO:0071704,GO:0044464,GO:0044238,GO:0044237,GO:0005622,GO:0044424,GO:0043170,GO:0097159,GO:1901363,GO:0043226,GO:0043229,GO:0044260,GO:0043227,GO:0043231,GO:0006807,GO:0009058,GO:0034641,GO:1901576,GO:0044249,GO:…
GhGLK98	Ghir_D06G023600	897	298	ChrD06: 66690919-66694397 +	32958.2	5.68	50.61	Nucleus	GO:0008150,GO:0003674,GO:0005575,GO:0044699,GO:0044763,GO:0050896,GO:0051716,GO:0007154,GO:0023052,GO:0044700,GO:0007165,GO:0035556,GO:0008152,GO:0009987,GO:0005488,GO:0000160,GO:0005623,GO:0071704,GO:0044464,GO:0044238,GO:0044237,GO:0005622,GO:0044424,GO:0043170,GO:0097159,GO:1901363,GO:0043226,GO:0043229,GO:0044260,GO:0043227,GO:0043231,GO:0006807,GO:0009058,GO:0034641,GO:1901576,GO:0044249,GO:…
GhGLK99	Ghir_D06G023610	1041	346	ChrD06: 66695432-66700414 +	37288.8	7.26	47.16	Nucleus	GO:0008150,GO:0003674,GO:0005575,GO:0008152,GO:0009987,GO:0005488,GO:0005623,GO:0071704,GO:0044464,GO:0044238,GO:0044237,GO:0005622,GO:0044424,GO:0043170,GO:0097159,GO:1901363,GO:0043226,GO:0043229,GO:0044260,GO:0043227,GO:0043231,GO:0006807,GO:0009058,GO:0034641,GO:1901576,GO:0044249,GO:0065007,GO:0050789,GO:1901360,GO:0006725,GO:0046483,GO:0003676,GO:0006139,GO:0050794,GO:0010467,GO:0009059,GO:…
GhGLK100	Ghir_D07G000260	1326	441	ChrD07: 302296-305280 -	48674.2	6.6	59.25	Nucleus	GO:0008150,GO:0003674,GO:0005575,GO:0008152,GO:0009987,GO:0005488,GO:0005623,GO:0071704,GO:0044464,GO:0044238,GO:0044237,GO:0005622,GO:0044424,GO:0043170,GO:0097159,GO:1901363,GO:0043226,GO:0043229,GO:0044260,GO:0043227,GO:0043231,GO:0006807,GO:0009058,GO:0034641,GO:1901576,GO:0044249,GO:0065007,GO:0050789,GO:1901360,GO:0006725,GO:0046483,GO:0003676,GO:0006139,GO:0050794,GO:0010467,GO:0009059,GO:…
GhGLK101	Ghir_D07G003000	1998	665	ChrD07: 3162692-3166273 +	72888.4	5.41	36.1	Nucleus	GO:0008150,GO:0003674,GO:0005575,GO:0008152,GO:0009987,GO:0005488,GO:0005623,GO:0071704,GO:0044464,GO:0044238,GO:0044237,GO:0005622,GO:0044424,GO:0043170,GO:0097159,GO:1901363,GO:0043226,GO:0043229,GO:0044260,GO:0043227,GO:0043231,GO:0006807,GO:0009058,GO:0034641,GO:1901576,GO:0044249,GO:0065007,GO:0050789,GO:1901360,GO:0006725,GO:0046483,GO:0003676,GO:0006139,GO:0050794,GO:0010467,GO:0009059,GO:…
GhGLK102	Ghir_D07G006650	1101	366	ChrD07: 7297615-7316445 +	41236.1	9.7	45.57	Nucleus	GO:0008150,GO:0003674,GO:0005575,GO:0008152,GO:0009987,GO:0005488,GO:0005623,GO:0071704,GO:0044464,GO:0044238,GO:0044237,GO:0005622,GO:0044424,GO:0043170,GO:0097159,GO:1901363,GO:0043226,GO:0043229,GO:0044260,GO:0043227,GO:0043231,GO:0006807,GO:0009058,GO:0034641,GO:1901576,GO:0044249,GO:0065007,GO:0050789,GO:1901360,GO:0006725,GO:0046483,GO:0003676,GO:0006139,GO:0050794,GO:0010467,GO:0009059,GO:…
GhGLK103	Ghir_D07G008760	714	237	ChrD07: 10242719-10244388 +	27597.9	6.51	47.28	Nucleus	GO:0008150,GO:0003674,GO:0005575,GO:0008152,GO:0009987,GO:0005488,GO:0005623,GO:0071704,GO:0044464,GO:0044238,GO:0044237,GO:0005622,GO:0044424,GO:0043170,GO:0097159,GO:1901363,GO:0043226,GO:0043229,GO:0044260,GO:0043227,GO:0043231,GO:0006807,GO:0009058,GO:0034641,GO:1901576,GO:0044249,GO:0065007,GO:0050789,GO:1901360,GO:0006725,GO:0046483,GO:0003676,GO:0006139,GO:0050794,GO:0010467,GO:0009059,GO:…
GhGLK104	Ghir_D07G010840	1023	340	ChrD07: 13780652-13783226 +	36620.6	5.35	40.54	Nucleus	GO:0008150,GO:0003674,GO:0005575,GO:0032502,GO:0009888,GO:0010087,GO:0048856,GO:0010089,GO:0010088,GO:0008152,GO:0009987,GO:0005488,GO:0005623,GO:0071704,GO:0044464,GO:0044238,GO:0044237,GO:0005622,GO:0044424,GO:0043170,GO:0097159,GO:1901363,GO:0043226,GO:0043229,GO:0044260,GO:0043227,GO:0043231,GO:0006807,GO:0009058,GO:0034641,GO:1901576,GO:0044249,GO:0065007,GO:0050789,GO:1901360,GO:0006725,GO:…
GhGLK105	Ghir_D07G019450	855	284	ChrD07: 47625062-47627953 +	31962.7	9.23	44.39	Nucleus	GO:0008150,GO:0003674,GO:0005575,GO:0044699,GO:0044763,GO:0050896,GO:0001071,GO:0003700,GO:0051716,GO:0007154,GO:0023052,GO:0044700,GO:0007165,GO:0035556,GO:0008152,GO:0009987,GO:0005488,GO:0000160,GO:0005623,GO:0071704,GO:0044464,GO:0044238,GO:0044237,GO:0005622,GO:0044424,GO:0043170,GO:0097159,GO:1901363,GO:0043226,GO:0043229,GO:0044260,GO:0043227,GO:0043231,GO:0006807,GO:0009058,GO:0034641,GO:…
GhGLK106	Ghir_D08G002240	1137	378	ChrD08: 1890155-1893917 -	42751.1	7.72	59.15	Nucleus	GO:0008150,GO:0003674,GO:0005575,GO:0008152,GO:0009987,GO:0005488,GO:0005623,GO:0071704,GO:0044464,GO:0044238,GO:0044237,GO:0005622,GO:0044424,GO:0043170,GO:0097159,GO:1901363,GO:0043226,GO:0043229,GO:0044260,GO:0043227,GO:0043231,GO:0006807,GO:0009058,GO:0034641,GO:1901576,GO:0044249,GO:0065007,GO:0050789,GO:1901360,GO:0006725,GO:0046483,GO:0003676,GO:0006139,GO:0050794,GO:0010467,GO:0009059,GO:…
GhGLK107	Ghir_D08G016840	840	279	ChrD08: 54878252-54880557 -	31618.4	9.27	32.45	Nucleus	GO:0008150,GO:0003674,GO:0005575,GO:0008152,GO:0009987,GO:0005488,GO:0005623,GO:0071704,GO:0044464,GO:0044238,GO:0044237,GO:0005622,GO:0044424,GO:0043170,GO:0097159,GO:1901363,GO:0043226,GO:0043229,GO:0044260,GO:0043227,GO:0043231,GO:0006807,GO:0009058,GO:0034641,GO:1901576,GO:0044249,GO:0065007,GO:0050789,GO:1901360,GO:0006725,GO:0046483,GO:0003676,GO:0006139,GO:0050794,GO:0010467,GO:0009059,GO:…
GhGLK108	Ghir_D08G017100	1119	372	ChrD08: 55423516-55428861 -	41748.6	8.85	61.13	Nucleus	GO:0008150,GO:0003674,GO:0005575,GO:0008152,GO:0009987,GO:0005488,GO:0005623,GO:0071704,GO:0044464,GO:0044238,GO:0044237,GO:0005622,GO:0044424,GO:0043170,GO:0097159,GO:1901363,GO:0043226,GO:0043229,GO:0044260,GO:0043227,GO:0043231,GO:0006807,GO:0009058,GO:0034641,GO:1901576,GO:0044249,GO:0065007,GO:0050789,GO:1901360,GO:0006725,GO:0046483,GO:0003676,GO:0006139,GO:0050794,GO:0010467,GO:0009059,GO:…
GhGLK109	Ghir_D08G017610	1662	553	ChrD08: 56216744-56222608 -	61963.8	6.26	46.94	Nucleus	GO:0008150,GO:0003674,GO:0005575,GO:0008152,GO:0009987,GO:0005488,GO:0005623,GO:0071704,GO:0044464,GO:0044238,GO:0044237,GO:0005622,GO:0044424,GO:0043170,GO:0097159,GO:1901363,GO:0043226,GO:0043229,GO:0044260,GO:0043227,GO:0043231,GO:0006807,GO:0009058,GO:0034641,GO:1901576,GO:0044249,GO:0065007,GO:0050789,GO:1901360,GO:0006725,GO:0046483,GO:0003676,GO:0006139,GO:0050794,GO:0010467,GO:0009059,GO:…
GhGLK110	Ghir_D08G021920	642	213	ChrD08: 63316431-63317620 -	24292.7	9.13	60.11	Nucleus	GO:0008150,GO:0044710,GO:0003674,GO:0005575,GO:0019538,GO:0044267,GO:0043412,GO:0006464,GO:0036211,GO:0044699,GO:0071840,GO:0016043,GO:0044763,GO:0006996,GO:0043933,GO:0032259,GO:0009628,GO:1902589,GO:0009892,GO:0048519,GO:0051276,GO:0018193,GO:0048523,GO:0050793,GO:0048583,GO:0010605,GO:0051239,GO:0006325,GO:2000026,GO:0009314,GO:0009416,GO:0031324,GO:0032501,GO:0044767,GO:0043414,GO:0016568,GO:…
GhGLK111	Ghir_D08G023040	1008	335	ChrD08: 64549011 -64551127 -	37537.5	8.04	40.56	Nucleus	GO:0008150,GO:0003674,GO:0005575,GO:0044699,GO:0044763,GO:0050896,GO:0001071,GO:0003700,GO:0051716,GO:0007154,GO:0023052,GO:0044700,GO:0007165,GO:0035556,GO:0008152,GO:0009987,GO:0005488,GO:0000160,GO:0005623,GO:0071704,GO:0044464,GO:0044238,GO:0044237,GO:0005622,GO:0044424,GO:0043170,GO:0097159,GO:1901363,GO:0043226,GO:0043229,GO:0044260,GO:0043227,GO:0043231,GO:0006807,GO:0009058,GO:0034641,GO:…
GhGLK112	Ghir_D08G025230	612	203	ChrD08: 66871579-66873782 -	23796.7	9.63	41.98	Cytoplasm\Nucleus	GO:0008150,GO:0003674,GO:0005575,GO:0044699,GO:0044763,GO:0050896,GO:0001071,GO:0003700,GO:0051716,GO:0007154,GO:0023052,GO:0044700,GO:0007165,GO:0035556,GO:0008152,GO:0009987,GO:0005488,GO:0000160,GO:0005623,GO:0071704,GO:0044464,GO:0044238,GO:0044237,GO:0005622,GO:0044424,GO:0043170,GO:0097159,GO:1901363,GO:0043226,GO:0043229,GO:0044260,GO:0043227,GO:0043231,GO:0006807,GO:0009058,GO:0034641,GO:…
GhGLK113	Ghir_D08G027280	1812	603	ChrD08: 68631691-68635080 +	65704.3	6.1	39.38	Nucleus	GO:0008150,GO:0003674,GO:0005575,GO:0008152,GO:0009987,GO:0005488,GO:0005623,GO:0071704,GO:0044464,GO:0044238,GO:0044237,GO:0005622,GO:0044424,GO:0043170,GO:0097159,GO:1901363,GO:0043226,GO:0043229,GO:0044260,GO:0043227,GO:0043231,GO:0006807,GO:0009058,GO:0034641,GO:1901576,GO:0044249,GO:0065007,GO:0050789,GO:1901360,GO:0006725,GO:0046483,GO:0003676,GO:0006139,GO:0050794,GO:0010467,GO:0009059,GO:…
GhGLK114	Ghir_D08G027380	1986	661	ChrD08: 68700632-68704033 +	72159.6	5.53	41.45	Nucleus	GO:0008150,GO:0003674,GO:0005575,GO:0008152,GO:0009987,GO:0005488,GO:0005623,GO:0071704,GO:0044464,GO:0044238,GO:0044237,GO:0005622,GO:0044424,GO:0043170,GO:0097159,GO:1901363,GO:0043226,GO:0043229,GO:0044260,GO:0043227,GO:0043231,GO:0006807,GO:0009058,GO:0034641,GO:1901576,GO:0044249,GO:0065007,GO:0050789,GO:1901360,GO:0006725,GO:0046483,GO:0003676,GO:0006139,GO:0050794,GO:0010467,GO:0009059,GO:…
GhGLK115	Ghir_D09G013060	951	316	ChrD09: 40813168-40815218 -	36451.1	8.46	64.1	Nucleus	GO:0008150,GO:0003674,GO:0005575,GO:0008152,GO:0009987,GO:0005488,GO:0005623,GO:0071704,GO:0044464,GO:0044238,GO:0044237,GO:0005622,GO:0044424,GO:0043170,GO:0097159,GO:1901363,GO:0043226,GO:0043229,GO:0044260,GO:0043227,GO:0043231,GO:0006807,GO:0009058,GO:0034641,GO:1901576,GO:0044249,GO:0065007,GO:0050789,GO:1901360,GO:0006725,GO:0046483,GO:0003676,GO:0006139,GO:0050794,GO:0010467,GO:0009059,GO:…
GhGLK116	Ghir_D09G016860	804	267	ChrD09: 45165319-45166974 +	30059.7	7.74	56.01	Nucleus	GO:0008150,GO:0003674,GO:0005575,GO:0044699,GO:0071944,GO:0005618,GO:0030312,GO:0032501,GO:0044767,GO:0044707,GO:0007275,GO:0032502,GO:0009888,GO:0044702,GO:0048856,GO:0000975,GO:0001067,GO:0044212,GO:0048731,GO:0000003,GO:0022414,GO:0009791,GO:0003006,GO:0099402,GO:0048367,GO:0048608,GO:0061458,GO:0090567,GO:0048827,GO:0009908,GO:0080060,GO:0048437,GO:0048438,GO:0048467,GO:0048440,GO:0035670,GO:…
GhGLK117	Ghir_D09G017680	1212	403	ChrD09: 45975102-45982716 -	44317.1	8.75	59.91	Nucleus	GO:0008150,GO:0003674,GO:0005575,GO:0008152,GO:0009987,GO:0005488,GO:0005623,GO:0071704,GO:0044464,GO:0044238,GO:0044237,GO:0005622,GO:0044424,GO:0043170,GO:0097159,GO:1901363,GO:0043226,GO:0043229,GO:0044260,GO:0043227,GO:0043231,GO:0006807,GO:0009058,GO:0034641,GO:1901576,GO:0044249,GO:0065007,GO:0050789,GO:1901360,GO:0006725,GO:0046483,GO:0003676,GO:0006139,GO:0050794,GO:0010467,GO:0009059,GO:…
GhGLK118	Ghir_D09G020760	807	268	ChrD09: 48944778-48948046 +	29462.4	6.61	55.08	Nucleus	GO:0008150,GO:0003674,GO:0005575,GO:0044699,GO:0032501,GO:0044767,GO:0044707,GO:0007275,GO:0032502,GO:0044702,GO:0048856,GO:0048731,GO:0000003,GO:0022414,GO:0009791,GO:0003006,GO:0099402,GO:0048367,GO:0048608,GO:0061458,GO:0090567,GO:0048827,GO:0009908,GO:0048437,GO:0048438,GO:0048467,GO:0048440,GO:0035670,GO:0048481,GO:0008152,GO:0009987,GO:0005488,GO:0005623,GO:0071704,GO:0044464,GO:0044238,GO:…
GhGLK119	Ghir_D09G024180	2061	686	ChrD09: 51731057-51736443 -	75874.5	6.03	48.05	Nucleus	GO:0008150,GO:0048519,GO:0008152,GO:0009987,GO:0071704,GO:0044238,GO:0044237,GO:0043170,GO:0044260,GO:0006807,GO:0009058,GO:0034641,GO:1901576,GO:0044249,GO:0065007,GO:0050789,GO:1901360,GO:0006725,GO:0046483,GO:0006139,GO:0050794,GO:0010467,GO:0009059,GO:0044271,GO:0034645,GO:0090304,GO:0019222,GO:0016070,GO:0060255,GO:0031323,GO:1901362,GO:0080090,GO:0018130,GO:0019438,GO:0051171,GO:0009889,GO:…
GhGLK120	Ghir_D10G000130	1302	433	ChrD10: 159815-165654 -	48090.9	5.5	69.63	Nucleus	GO:0008150,GO:0003674,GO:0005575,GO:0008152,GO:0009987,GO:0005488,GO:0005623,GO:0071704,GO:0044464,GO:0044238,GO:0044237,GO:0005622,GO:0044424,GO:0043170,GO:0097159,GO:1901363,GO:0043226,GO:0043229,GO:0044260,GO:0043227,GO:0043231,GO:0006807,GO:0009058,GO:0034641,GO:1901576,GO:0044249,GO:0065007,GO:0050789,GO:1901360,GO:0006725,GO:0046483,GO:0003676,GO:0006139,GO:0050794,GO:0010467,GO:0009059,GO:…
GhGLK121	Ghir_D10G004160	1125	374	ChrD10: 3460517-3466017 +	43432.8	8.41	55.73	Nucleus	GO:0008150,GO:0003674,GO:0005575,GO:0008152,GO:0009987,GO:0005488,GO:0005623,GO:0071704,GO:0044464,GO:0044238,GO:0044237,GO:0005622,GO:0044424,GO:0043170,GO:0097159,GO:1901363,GO:0043226,GO:0043229,GO:0044260,GO:0043227,GO:0043231,GO:0006807,GO:0009058,GO:0034641,GO:1901576,GO:0044249,GO:0065007,GO:0050789,GO:1901360,GO:0006725,GO:0046483,GO:0003676,GO:0006139,GO:0050794,GO:0010467,GO:0009059,GO:…
GhGLK122	Ghir_D10G015140	1179	392	ChrD10: 28598277-28602871 -	43332.2	7.6	57.22	Nucleus	GO:0008150,GO:0003674,GO:0005575,GO:0008152,GO:0009987,GO:0005488,GO:0005623,GO:0071704,GO:0044464,GO:0044238,GO:0044237,GO:0005622,GO:0044424,GO:0043170,GO:0097159,GO:1901363,GO:0043226,GO:0043229,GO:0044260,GO:0043227,GO:0043231,GO:0006807,GO:0009058,GO:0034641,GO:1901576,GO:0044249,GO:0065007,GO:0050789,GO:1901360,GO:0006725,GO:0046483,GO:0003676,GO:0006139,GO:0050794,GO:0010467,GO:0009059,GO:…
GhGLK123	Ghir_D10G018760	2046	681	ChrD10: 51613289-51617155 -	74829.1	6.16	52	Nucleus	GO:0008150,GO:0003674,GO:0005575,GO:0008152,GO:0009987,GO:0005488,GO:0005623,GO:0071704,GO:0044464,GO:0044238,GO:0044237,GO:0005622,GO:0044424,GO:0043170,GO:0097159,GO:1901363,GO:0043226,GO:0043229,GO:0044260,GO:0043227,GO:0043231,GO:0006807,GO:0009058,GO:0034641,GO:1901576,GO:0044249,GO:0065007,GO:0050789,GO:1901360,GO:0006725,GO:0046483,GO:0003676,GO:0006139,GO:0050794,GO:0010467,GO:0009059,GO:…
GhGLK124	Ghir_D10G026740	951	316	ChrD10: 67289490-67291895 +	35652.8	8.52	50.68	Nucleus	GO:0008150,GO:0003674,GO:0005575,GO:0008152,GO:0009987,GO:0005488,GO:0005623,GO:0071704,GO:0044464,GO:0044238,GO:0044237,GO:0005622,GO:0044424,GO:0043170,GO:0097159,GO:1901363,GO:0043226,GO:0043229,GO:0044260,GO:0043227,GO:0043231,GO:0006807,GO:0009058,GO:0034641,GO:1901576,GO:0044249,GO:0065007,GO:0050789,GO:1901360,GO:0006725,GO:0046483,GO:0003676,GO:0006139,GO:0050794,GO:0010467,GO:0009059,GO:…
GhGLK125	Ghir_D10G027610	1200	399	Scaffold3348: 30072-35407 +	44483.9	5.79	66.12	Nucleus
GhGLK126	Ghir_D11G005100	1038	345	ChrD11: 4134201-4136351 +	38690.7	6.36	58.16	Nucleus
GhGLK127	Ghir_D11G011990	1299	432	ChrD11: 10844639-10846402 -	48139.7	5.19	43.33	Cytoplasm\Nucleus	GO:0008150,GO:0003674,GO:0005575,GO:0008152,GO:0009987,GO:0005488,GO:0005623,GO:0071704,GO:0044464,GO:0044238,GO:0044237,GO:0005622,GO:0044424,GO:0043170,GO:0097159,GO:1901363,GO:0043226,GO:0043229,GO:0044260,GO:0043227,GO:0043231,GO:0006807,GO:0009058,GO:0034641,GO:1901576,GO:0044249,GO:0065007,GO:0050789,GO:1901360,GO:0006725,GO:0046483,GO:0003676,GO:0006139,GO:0050794,GO:0010467,GO:0009059,GO:…
GhGLK128	Ghir_D11G014170	1437	478	ChrD11: 13503888-13510648 -	52511.5	5.62	63.12	Chloroplast\Nucleus	GO:0008150,GO:0003674,GO:0005575,GO:0008152,GO:0009987,GO:0005488,GO:0005623,GO:0071704,GO:0044464,GO:0044238,GO:0044237,GO:0005622,GO:0044424,GO:0043170,GO:0097159,GO:1901363,GO:0043226,GO:0043229,GO:0044260,GO:0043227,GO:0043231,GO:0006807,GO:0009058,GO:0034641,GO:1901576,GO:0044249,GO:0065007,GO:0050789,GO:1901360,GO:0006725,GO:0046483,GO:0003676,GO:0006139,GO:0050794,GO:0010467,GO:0009059,GO:…
GhGLK129	Ghir_D11G026820	1209	402	ChrD11: 57122441-57126691 +	44719.1	5.75	49.13	Nucleus
GhGLK130	Ghir_D11G028040	1164	387	ChrD11: 59939198-59941551 +	43073.5	6.93	41.5	Nucleus
GhGLK131	Ghir_D11G036770	867	288	Scaffold404: 161072-163263 -	31258.2	7	60.24	Nucleus	GO:0008150,GO:0003674,GO:0005575,GO:0044699,GO:0032501,GO:0044767,GO:0044707,GO:0007275,GO:0032502,GO:0044702,GO:0048856,GO:0048731,GO:0000003,GO:0022414,GO:0009791,GO:0007389,GO:0003002,GO:0003006,GO:0099402,GO:0048367,GO:0048608,GO:0061458,GO:0090567,GO:0048827,GO:0009908,GO:0009798,GO:0009955,GO:0009943,GO:0009944,GO:0065001,GO:0048437,GO:0048438,GO:0048467,GO:0048440,GO:0035670,GO:0048481,GO:…
GhGLK132	Ghir_D12G002580	1227	408	ChrD12: 3254483-3257863 -	45520.1	8.64	71.11	Nucleus	GO:0008150,GO:0003674,GO:0005575,GO:0044699,GO:0044763,GO:0050896,GO:0051716,GO:0007154,GO:0023052,GO:0044700,GO:0007165,GO:0035556,GO:0008152,GO:0009987,GO:0005488,GO:0000160,GO:0005623,GO:0071704,GO:0044464,GO:0044238,GO:0044237,GO:0005622,GO:0044424,GO:0043170,GO:0097159,GO:1901363,GO:0043226,GO:0043229,GO:0044260,GO:0043227,GO:0043231,GO:0006807,GO:0009058,GO:0034641,GO:1901576,GO:0044249,GO:…
GhGLK133	Ghir_D12G007190	1101	366	ChrD12: 13311527-13314008 +	40951.1	6.37	54.69	Nucleus	GO:0008150,GO:0008152,GO:0009987,GO:0071704,GO:0044238,GO:0044237,GO:0043170,GO:0044260,GO:0006807,GO:0009058,GO:0034641,GO:1901576,GO:0044249,GO:1901360,GO:0006725,GO:0046483,GO:0006139,GO:0010467,GO:0009059,GO:0044271,GO:0034645,GO:0090304,GO:0016070,GO:1901362,GO:0018130,GO:0019438,GO:0034654,GO:0032774,GO:0097659,GO:0006351
GhGLK134	Ghir_D12G015260	1071	356	ChrD12: 46271934-46276273 +	39332.9	9.71	55.5	Nucleus	GO:0008150,GO:0003674,GO:0005575,GO:0008152,GO:0009987,GO:0005488,GO:0005623,GO:0071704,GO:0044464,GO:0044238,GO:0044237,GO:0005622,GO:0044424,GO:0043170,GO:0097159,GO:1901363,GO:0043226,GO:0043229,GO:0044260,GO:0043227,GO:0043231,GO:0006807,GO:0009058,GO:0034641,GO:1901576,GO:0044249,GO:0065007,GO:0050789,GO:1901360,GO:0006725,GO:0046483,GO:0003676,GO:0006139,GO:0050794,GO:0010467,GO:0009059,GO:…
GhGLK135	Ghir_D12G018300	1140	379	ChrD12: 51408585-51411194 -	41979.5	6.65	74.86	Nucleus	GO:0008150,GO:0003674,GO:0005575,GO:0008152,GO:0009987,GO:0005488,GO:0005623,GO:0071704,GO:0044464,GO:0044238,GO:0044237,GO:0005622,GO:0044424,GO:0043170,GO:0097159,GO:1901363,GO:0043226,GO:0043229,GO:0044260,GO:0043227,GO:0043231,GO:0006807,GO:0009058,GO:0034641,GO:1901576,GO:0044249,GO:0065007,GO:0050789,GO:1901360,GO:0006725,GO:0046483,GO:0003676,GO:0006139,GO:0050794,GO:0010467,GO:0009059,GO:…
GhGLK136	Ghir_D12G021680	711	236	ChrD12: 55685823-55687713 -	26531.8	8.31	31.11	Nucleus	GO:0008150,GO:0003674,GO:0005575,GO:0008152,GO:0009987,GO:0005488,GO:0005623,GO:0071704,GO:0044464,GO:0044238,GO:0044237,GO:0005622,GO:0044424,GO:0043170,GO:0097159,GO:1901363,GO:0043226,GO:0043229,GO:0044260,GO:0043227,GO:0043231,GO:0006807,GO:0009058,GO:0034641,GO:1901576,GO:0044249,GO:0065007,GO:0050789,GO:1901360,GO:0006725,GO:0046483,GO:0003676,GO:0006139,GO:0050794,GO:0010467,GO:0009059,GO:…
GhGLK137	Ghir_D12G021930	1146	381	ChrD12: 55943151-55948751 -	42511.4	9.12	61.1	Nucleus	GO:0008150,GO:0003674,GO:0005575,GO:0008152,GO:0009987,GO:0005488,GO:0005623,GO:0071704,GO:0044464,GO:0044238,GO:0044237,GO:0005622,GO:0044424,GO:0043170,GO:0097159,GO:1901363,GO:0043226,GO:0043229,GO:0044260,GO:0043227,GO:0043231,GO:0006807,GO:0009058,GO:0034641,GO:1901576,GO:0044249,GO:0065007,GO:0050789,GO:1901360,GO:0006725,GO:0046483,GO:0003676,GO:0006139,GO:0050794,GO:0010467,GO:0009059,GO:…
GhGLK138	Ghir_D12G022360	1704	567	ChrD12: 56430597-56436383 -	62755.7	6.03	48.54	Nucleus	GO:0008150,GO:0003674,GO:0005575,GO:0008152,GO:0009987,GO:0005488,GO:0005623,GO:0071704,GO:0044464,GO:0044238,GO:0044237,GO:0005622,GO:0044424,GO:0043170,GO:0097159,GO:1901363,GO:0043226,GO:0043229,GO:0044260,GO:0043227,GO:0043231,GO:0006807,GO:0009058,GO:0034641,GO:1901576,GO:0044249,GO:0065007,GO:0050789,GO:1901360,GO:0006725,GO:0046483,GO:0003676,GO:0006139,GO:0050794,GO:0010467,GO:0009059,GO:…
GhGLK139	Ghir_D12G027450	2481	826	ChrD12: 61189586 -61194156 -	88155.9	5.67	41.41	Chloroplast	GO:0008150,GO:0003674,GO:0005575,GO:0008152,GO:0009987,GO:0005488,GO:0005623,GO:0071704,GO:0044464,GO:0044238,GO:0044237,GO:0005622,GO:0044424,GO:0043170,GO:0097159,GO:1901363,GO:0043226,GO:0043229,GO:0044260,GO:0043227,GO:0043231,GO:0006807,GO:0009058,GO:0034641,GO:1901576,GO:0044249,GO:0065007,GO:0050789,GO:1901360,GO:0006725,GO:0046483,GO:0003676,GO:0006139,GO:0050794,GO:0010467,GO:0009059,GO:…
GhGLK140	Ghir_D12G028600	1089	362	ChrD12: 62142234-62147890 +	39091.3	6.23	49.83	Nucleus	GO:0008150,GO:0003674,GO:0003824,GO:0005575,GO:0016740,GO:0044699,GO:0006793,GO:0006796,GO:0044763,GO:0016310,GO:0016772,GO:0016301,GO:0050896,GO:0001071,GO:0003700,GO:0051716,GO:0007154,GO:0023052,GO:0044700,GO:0007165,GO:0035556,GO:0008152,GO:0009987,GO:0005488,GO:0000160,GO:0005623,GO:0071704,GO:0044464,GO:0044238,GO:0044237,GO:0005622,GO:0044424,GO:0043170,GO:0097159,GO:1901363,GO:0043226,GO:…
GhGLK141	Ghir_D13G003780	1227	408	ChrD13: 3750813-3753656 +	45455.9	6.8	63.25	Nucleus	GO:0008150,GO:0003674,GO:0005575,GO:0008152,GO:0009987,GO:0005488,GO:0005623,GO:0071704,GO:0044464,GO:0044238,GO:0044237,GO:0005622,GO:0044424,GO:0043170,GO:0097159,GO:1901363,GO:0043226,GO:0043229,GO:0044260,GO:0043227,GO:0043231,GO:0006807,GO:0009058,GO:0034641,GO:1901576,GO:0044249,GO:0065007,GO:0050789,GO:1901360,GO:0006725,GO:0046483,GO:0003676,GO:0006139,GO:0050794,GO:0010467,GO:0009059,GO:…
GhGLK142	Ghir_D13G007270	1332	443	ChrD13: 11331539-11333555 +	49055	7.61	57.19	Nucleus	GO:0008150,GO:0003674,GO:0005575,GO:0008152,GO:0009987,GO:0005488,GO:0005623,GO:0071704,GO:0044464,GO:0044238,GO:0044237,GO:0005622,GO:0044424,GO:0043170,GO:0097159,GO:1901363,GO:0043226,GO:0043229,GO:0044260,GO:0043227,GO:0043231,GO:0006807,GO:0009058,GO:0034641,GO:1901576,GO:0044249,GO:0065007,GO:0050789,GO:1901360,GO:0006725,GO:0046483,GO:0003676,GO:0006139,GO:0050794,GO:0010467,GO:0009059,GO:…
GhGLK143	Ghir_D13G007830	1071	356	ChrD13: 13394756-13397098 -	39260.6	8.29	41.97	Nucleus	GO:0008150,GO:0003674,GO:0003824,GO:0005575,GO:0016740,GO:0044699,GO:0006793,GO:0006796,GO:0044763,GO:0016310,GO:0016772,GO:0016301,GO:0050896,GO:0001071,GO:0003700,GO:0051716,GO:0007154,GO:0023052,GO:0044700,GO:0007165,GO:0035556,GO:0008152,GO:0009987,GO:0005488,GO:0000160,GO:0005623,GO:0071704,GO:0044464,GO:0044238,GO:0044237,GO:0005622,GO:0044424,GO:0043170,GO:0097159,GO:1901363,GO:0043226,GO:…
GhGLK144	Ghir_D13G011790	1059	352	ChrD13: 36038503-36039984 +	38750.7	7.23	42.53	Nucleus	GO:0008150,GO:0003674,GO:0005575,GO:0008152,GO:0009987,GO:0005488,GO:0005623,GO:0071704,GO:0044464,GO:0044238,GO:0044237,GO:0005622,GO:0044424,GO:0043170,GO:0097159,GO:1901363,GO:0043226,GO:0043229,GO:0044260,GO:0043227,GO:0043231,GO:0006807,GO:0009058,GO:0034641,GO:1901576,GO:0044249,GO:0065007,GO:0050789,GO:1901360,GO:0006725,GO:0046483,GO:0003676,GO:0006139,GO:0050794,GO:0010467,GO:0009059,GO:…
GhGLK145	Ghir_D13G013910	1044	347	ChrD13: 45129552-45131953 -	38580.9	7.71	54.37	Nucleus	GO:0008150,GO:0003674,GO:0005575,GO:0008152,GO:0009987,GO:0005488,GO:0005623,GO:0071704,GO:0044464,GO:0044238,GO:0044237,GO:0005622,GO:0044424,GO:0043170,GO:0097159,GO:1901363,GO:0043226,GO:0043229,GO:0044260,GO:0043227,GO:0043231,GO:0006807,GO:0009058,GO:0034641,GO:1901576,GO:0044249,GO:0065007,GO:0050789,GO:1901360,GO:0006725,GO:0046483,GO:0003676,GO:0006139,GO:0050794,GO:0010467,GO:0009059,GO:…
GhGLK146	Ghir_D13G020100	1848	615	ChrD13: 57834575-57838365 -	67196.9	6.32	35.65	Nucleus	GO:0008150,GO:0003674,GO:0005575,GO:0008152,GO:0009987,GO:0005488,GO:0005623,GO:0071704,GO:0044464,GO:0044238,GO:0044237,GO:0005622,GO:0044424,GO:0043170,GO:0097159,GO:1901363,GO:0043226,GO:0043229,GO:0044260,GO:0043227,GO:0043231,GO:0006807,GO:0009058,GO:0034641,GO:1901576,GO:0044249,GO:0065007,GO:0050789,GO:1901360,GO:0006725,GO:0046483,GO:0003676,GO:0006139,GO:0050794,GO:0010467,GO:0009059,GO:…
