# Supplementary material for: Identification of the Golden-2-like transcription factors gene family in Gossypium hirsutum
Source: PeerJ. 2021 Nov 16;9:e12484. doi: 10.7717/peerj.12484 (PMC8603818; doi:10.7717/peerj.12484)
Supplement: Supplemental Information 3 — qRT-PCR results of 9 GhGLK genes under salt, drought and low temperature treatments. [file peerj-09-12484-s003.xlsx]

## Sheet: Actin
Sample Name	Target Name	CT
0h	Actin	20.3353
0h	Actin	20.7983
0h	Actin	20.5492
PEG 1h	Actin	24.6609
PEG 1h	Actin	24.9454
PEG 1h	Actin	23.0641
PEG 3h	Actin	25.4944
PEG 3h	Actin	25.1476
PEG 3h	Actin	24.4461
PEG 6h	Actin	23.7322
PEG 6h	Actin	23.1089
PEG 6h	Actin	23.0228
PEG 12h	Actin	24.9651
PEG 12h	Actin	24.7599
PEG 12h	Actin	24.946
PEG 24h	Actin	25.6768
PEG 24h	Actin	27.002
PEG 24h	Actin	26.3253
0h	Actin	21.523
0h	Actin	21.21
0h	Actin	20.965
Cold 1h	Actin	22.2507
Cold 1h	Actin	22.6429
Cold 1h	Actin	22.1509
Cold 3h	Actin	23.0071
Cold 3h	Actin	22.8616
Cold 3h	Actin	22.8539
Cold 6h	Actin	22.9776
Cold 6h	Actin	23.2427
Cold 6h	Actin	23.1969
Cold 12h	Actin	23.9035
Cold 12h	Actin	23.3505
Cold 12h	Actin	23.7466
Cold 24h	Actin	23.1401
Cold 24h	Actin	22.9155
Cold 24h	Actin	23.1215
0h	Actin	20.9142
0h	Actin	20.5848
0h	Actin	19.8427
NaCl 1h	Actin	22.6393
NaCl 1h	Actin	22.2554
NaCl 1h	Actin	21.2753
NaCl 3h	Actin	22.9088
NaCl 3h	Actin	22.5507
NaCl 3h	Actin	22.5592
NaCl 6h	Actin	22.3076
NaCl 6h	Actin	20.7083
NaCl 6h	Actin	21.9764
NaCl 12h	Actin	19.7556
NaCl 12h	Actin	19.5102
NaCl 12h	Actin	20.9644
NaCl 24h	Actin	22.3329
NaCl 24h	Actin	22.114
NaCl 24h	Actin	21.8377

## Sheet: GhGLK1
Sample Name	Target Name	CT
0h	GhGLK1	22.3647
0h	GhGLK1	22.903
0h	GhGLK1	23.1449
PEG 1h	GhGLK1	27.289
PEG 1h	GhGLK1	24.7898
PEG 1h	GhGLK1	25.8284
PEG 3h	GhGLK1	25.7821
PEG 3h	GhGLK1	26.7242
PEG 3h	GhGLK1	25.3385
PEG 6h	GhGLK1	25.6264
PEG 6h	GhGLK1	25.9414
PEG 6h	GhGLK1	24.6028
PEG 12h	GhGLK1	26.0484
PEG 12h	GhGLK1	26.4493
PEG 12h	GhGLK1	26.4537
PEG 24h	GhGLK1	25.5554
PEG 24h	GhGLK1	23.6577
PEG 24h	GhGLK1	23.9575
0h	GhGLK1	24.6852
0h	GhGLK1	24.1918
0h	GhGLK1	24.9053
Cold 1h	GhGLK1	24.9788
Cold 1h	GhGLK1	25.5838
Cold 1h	GhGLK1	22.9171
Cold 3h	GhGLK1	25.1954
Cold 3h	GhGLK1	25.488
Cold 3h	GhGLK1	25.4103
Cold 6h	GhGLK1	26.8158
Cold 6h	GhGLK1	26.7016
Cold 6h	GhGLK1	26.5801
Cold 12h	GhGLK1	27.2332
Cold 12h	GhGLK1	26.9388
Cold 12h	GhGLK1	27.2529
Cold 24h	GhGLK1	26.2951
Cold 24h	GhGLK1	26.8327
Cold 24h	GhGLK1	26.89
0h	GhGLK1	22.6797
0h	GhGLK1	22.6567
0h	GhGLK1	21.8118
NaCl 1h	GhGLK1	24.1981
NaCl 1h	GhGLK1	23.7127
NaCl 1h	GhGLK1	24.7048
NaCl 3h	GhGLK1	25.3227
NaCl 3h	GhGLK1	25.4151
NaCl 3h	GhGLK1	24.2876
NaCl 6h	GhGLK1	23.1639
NaCl 6h	GhGLK1	23.3594
NaCl 6h	GhGLK1	24.4735
NaCl 12h	GhGLK1	25.0744
NaCl 12h	GhGLK1	25.5526
NaCl 12h	GhGLK1	25.0402
NaCl 24h	GhGLK1	23.6997
NaCl 24h	GhGLK1	24.5558
NaCl 24h	GhGLK1	24.628

## Sheet: GhGLK8
Sample Name	Target Name	CT
0h	GhGLK8	24.024
0h	GhGLK8	24.3077
0h	GhGLK8	23.3991
PEG 1h	GhGLK8	24.3414
PEG 1h	GhGLK8	23.9395
PEG 1h	GhGLK8	23.086
PEG 3h	GhGLK8	25.8997
PEG 3h	GhGLK8	24.9926
PEG 3h	GhGLK8	22.8678
PEG 6h	GhGLK8	25.9655
PEG 6h	GhGLK8	23.5734
PEG 6h	GhGLK8	23.2747
PEG 12h	GhGLK8	26.7309
PEG 12h	GhGLK8	25.9672
PEG 12h	GhGLK8	25.6006
PEG 24h	GhGLK8	24.4145
PEG 24h	GhGLK8	23.7709
PEG 24h	GhGLK8	23.8401
0h	GhGLK8	23.8956
0h	GhGLK8	24.2673
0h	GhGLK8	23.8352
Cold 1h	GhGLK8	24.5959
Cold 1h	GhGLK8	25.4053
Cold 1h	GhGLK8	25.416
Cold 3h	GhGLK8	25.1269
Cold 3h	GhGLK8	25.2241
Cold 3h	GhGLK8	25.0111
Cold 6h	GhGLK8	25.9225
Cold 6h	GhGLK8	25.9215
Cold 6h	GhGLK8	25.9784
Cold 12h	GhGLK8	26.1049
Cold 12h	GhGLK8	26.6804
Cold 12h	GhGLK8	26.7154
Cold 24h	GhGLK8	24.3113
Cold 24h	GhGLK8	26.3012
Cold 24h	GhGLK8	26.53
0h	GhGLK8	21.6199
0h	GhGLK8	21.8808
0h	GhGLK8	21.7209
NaCl 1h	GhGLK8	23.4119
NaCl 1h	GhGLK8	23.4115
NaCl 1h	GhGLK8	23.1817
NaCl 3h	GhGLK8	24.2692
NaCl 3h	GhGLK8	24.0577
NaCl 3h	GhGLK8	24.4922
NaCl 6h	GhGLK8	24.9584
NaCl 6h	GhGLK8	24.7561
NaCl 6h	GhGLK8	24.0661
NaCl 12h	GhGLK8	26.3823
NaCl 12h	GhGLK8	25.2978
NaCl 12h	GhGLK8	26.422
NaCl 24h	GhGLK8	24.9123
NaCl 24h	GhGLK8	24.7158
NaCl 24h	GhGLK8	24.9469

## Sheet: GhGLK38
Sample Name	Target Name	CT
0h	GhGLK38	22.2698
0h	GhGLK38	21.3326
0h	GhGLK38	21.259
PEG 1h	GhGLK38	21.3987
PEG 1h	GhGLK38	21.4526
PEG 1h	GhGLK38	21.6419
PEG 3h	GhGLK38	22.8065
PEG 3h	GhGLK38	25.1813
PEG 3h	GhGLK38	24.5802
PEG 6h	GhGLK38	23.9222
PEG 6h	GhGLK38	23.6713
PEG 6h	GhGLK38	24.1591
PEG 12h	GhGLK38	25.4763
PEG 12h	GhGLK38	24.7726
PEG 12h	GhGLK38	23.8695
PEG 24h	GhGLK38	22.4454
PEG 24h	GhGLK38	22.5102
PEG 24h	GhGLK38	22.9344
0h	GhGLK38	19.1389
0h	GhGLK38	18.663
0h	GhGLK38	18.5329
Cold 1h	GhGLK38	20.5818
Cold 1h	GhGLK38	20.4724
Cold 1h	GhGLK38	17.731
Cold 3h	GhGLK38	37.0128
Cold 3h	GhGLK38	20.8167
Cold 3h	GhGLK38	19.8781
Cold 6h	GhGLK38	17.7735
Cold 6h	GhGLK38	20.4674
Cold 6h	GhGLK38	21.4678
Cold 12h	GhGLK38	20.3929
Cold 12h	GhGLK38	22.6342
Cold 12h	GhGLK38	22.6017
Cold 24h	GhGLK38	22.1375
Cold 24h	GhGLK38	21.6854
Cold 24h	GhGLK38	21.6185
0h	GhGLK38	22.7835
0h	GhGLK38	22.9397
0h	GhGLK38	21.8433
NaCl 1h	GhGLK38	22.7182
NaCl 1h	GhGLK38	22.5948
NaCl 1h	GhGLK38	23.3896
NaCl 3h	GhGLK38	23.382
NaCl 3h	GhGLK38	23.8474
NaCl 3h	GhGLK38	24.6566
NaCl 6h	GhGLK38	24.2828
NaCl 6h	GhGLK38	24.7626
NaCl 6h	GhGLK38	24.7589
NaCl 12h	GhGLK38	23.817
NaCl 12h	GhGLK38	23.683
NaCl 12h	GhGLK38	24.5198
NaCl 24h	GhGLK38	22.463
NaCl 24h	GhGLK38	23.2626
NaCl 24h	GhGLK38	23.3374

## Sheet: GhGLK39
Sample Name	Target Name	CT
0h	GhGLK39	24.7254
0h	GhGLK39	24.5998
0h	GhGLK39	24.2683
PEG 1h	GhGLK39	23.8578
PEG 1h	GhGLK39	24.0877
PEG 1h	GhGLK39	24.1746
PEG 3h	GhGLK39	26.4733
PEG 3h	GhGLK39	26.6818
PEG 3h	GhGLK39	26.5788
PEG 6h	GhGLK39	24.0203
PEG 6h	GhGLK39	23.1832
PEG 6h	GhGLK39	23.5636
PEG 12h	GhGLK39	24.5947
PEG 12h	GhGLK39	25.3043
PEG 12h	GhGLK39	24.4145
PEG 24h	GhGLK39	22.5966
PEG 24h	GhGLK39	22.1648
PEG 24h	GhGLK39	23.8925
0h	GhGLK39	24.8647
0h	GhGLK39	24.5939
0h	GhGLK39	25.0383
Cold 1h	GhGLK39	25.4913
Cold 1h	GhGLK39	25.7294
Cold 1h	GhGLK39	26.0441
Cold 3h	GhGLK39	26.7137
Cold 3h	GhGLK39	26.9439
Cold 3h	GhGLK39	26.9123
Cold 6h	GhGLK39	26.8311
Cold 6h	GhGLK39	26.7517
Cold 6h	GhGLK39	26.6791
Cold 12h	GhGLK39	27.3359
Cold 12h	GhGLK39	27.8522
Cold 12h	GhGLK39	27.4502
Cold 24h	GhGLK39	26.1354
Cold 24h	GhGLK39	26.1107
Cold 24h	GhGLK39	26.5458
0h	GhGLK39	22.5931
0h	GhGLK39	22.9663
0h	GhGLK39	23.1619
NaCl 1h	GhGLK39	23.6695
NaCl 1h	GhGLK39	24.2319
NaCl 1h	GhGLK39	23.5626
NaCl 3h	GhGLK39	25.841
NaCl 3h	GhGLK39	25.9503
NaCl 3h	GhGLK39	25.3008
NaCl 6h	GhGLK39	23.4105
NaCl 6h	GhGLK39	23.5178
NaCl 6h	GhGLK39	24.1149
NaCl 12h	GhGLK39	26.2158
NaCl 12h	GhGLK39	26.6393
NaCl 12h	GhGLK39	26.752
NaCl 24h	GhGLK39	23.6537
NaCl 24h	GhGLK39	24.2255
NaCl 24h	GhGLK39	23.1114

## Sheet: GhGLK46
Sample Name	Target Name	CT
0h	GhGLK46	25.3548
0h	Glk8	23.4175
0h	Glk8	23.4978
PEG 1h	Glk8	24.2361
PEG 1h	Glk8	23.7702
PEG 1h	Glk8	21.9229
PEG 3h	Glk8	24.674
PEG 3h	Glk8	25.2337
PEG 3h	Glk8	25.3485
PEG 6h	Glk8	24.7675
PEG 6h	Glk8	24.7091
PEG 6h	Glk8	24.8003
PEG 12h	Glk8	24.1004
PEG 12h	Glk8	24.6664
PEG 12h	Glk8	24.8476
PEG 24h	Glk8	22.9701
PEG 24h	Glk8	23.5812
PEG 24h	Glk8	24.9348
0h	Glk8	24.3381
0h	Glk8	25.9636
0h	Glk8	25.3779
Cold 1h	Glk8	25.8343
Cold 1h	Glk8	25.9243
Cold 1h	Glk8	26.1195
Cold 3h	Glk8	26.3338
Cold 3h	Glk8	26.3584
Cold 3h	Glk8	26.3018
Cold 6h	Glk8	26.8916
Cold 6h	Glk8	26.7728
Cold 6h	Glk8	27.1001
Cold 12h	Glk8	27.1014
Cold 12h	Glk8	27.5597
Cold 12h	Glk8	27.4376
Cold 24h	Glk8	27.2467
Cold 24h	Glk8	27.4454
Cold 24h	Glk8	27.4917
0h	Glk8	24.0257
0h	Glk8	23.6838
0h	Glk8	23.6784
NaCl 1h	Glk8	25.5675
NaCl 1h	Glk8	24.9434
NaCl 1h	Glk8	24.4759
NaCl 3h	Glk8	26.1044
NaCl 3h	Glk8	26.8219
NaCl 3h	Glk8	24.9656
NaCl 6h	Glk8	26.8452
NaCl 6h	Glk8	26.499
NaCl 6h	Glk8	25.6875
NaCl 12h	Glk8	25.3843
NaCl 12h	Glk8	25.5634
NaCl 12h	Glk8	24.4307
NaCl 24h	Glk8	24.2144
NaCl 24h	Glk8	23.9241
NaCl 24h	Glk8	24.8965

## Sheet: GhGLK47
Sample Name	Target Name	CT
0h	GhGLK47	24.5082
0h	GhGLK47	23.8857
0h	GhGLK47	23.9421
PEG 1h	GhGLK47	24.42
PEG 1h	GhGLK47	23.6601
PEG 1h	GhGLK47	24.5609
PEG 3h	GhGLK47	26.1139
PEG 3h	GhGLK47	26.5177
PEG 3h	GhGLK47	26.7273
PEG 6h	GhGLK47	23.9411
PEG 6h	GhGLK47	24.7703
PEG 6h	GhGLK47	24.9165
PEG 12h	GhGLK47	24.9388
PEG 12h	GhGLK47	24.4317
PEG 12h	GhGLK47	24.9345
PEG 24h	GhGLK47	22.041
PEG 24h	GhGLK47	22.8176
PEG 24h	GhGLK47	22.7575
0h	GhGLK47	24.1893
0h	GhGLK47	23.6636
0h	GhGLK47	23.1093
Cold 1h	GhGLK47	24.7449
Cold 1h	GhGLK47	24.657
Cold 1h	GhGLK47	24.6236
Cold 3h	GhGLK47	25.58
Cold 3h	GhGLK47	25.5364
Cold 3h	GhGLK47	25.8489
Cold 6h	GhGLK47	25.9267
Cold 6h	GhGLK47	25.9446
Cold 6h	GhGLK47	26.1066
Cold 12h	GhGLK47	26.4912
Cold 12h	GhGLK47	26.0966
Cold 12h	GhGLK47	26.2134
Cold 24h	GhGLK47	26.2777
Cold 24h	GhGLK47	26.5428
Cold 24h	GhGLK47	26.5852
0h	GhGLK47	22.5133
0h	GhGLK47	23.1927
0h	GhGLK47	22.7643
NaCl 1h	GhGLK47	23.6798
NaCl 1h	GhGLK47	24.4545
NaCl 1h	GhGLK47	23.7577
NaCl 3h	GhGLK47	24.6387
NaCl 3h	GhGLK47	24.7203
NaCl 3h	GhGLK47	25.2602
NaCl 6h	GhGLK47	25.0564
NaCl 6h	GhGLK47	25.1049
NaCl 6h	GhGLK47	24.9899
NaCl 12h	GhGLK47	24.9819
NaCl 12h	GhGLK47	24.1749
NaCl 12h	GhGLK47	24.7121
NaCl 24h	GhGLK47	23.8684
NaCl 24h	GhGLK47	23.4671
NaCl 24h	GhGLK47	23.9494

## Sheet: GhGLK55
Sample Name	Target Name	CT
0h	GhGLK55	26.9344
0h	GhGLK55	26.3371
0h	GhGLK55	26.5211
PEG 1h	GhGLK55	25.5824
PEG 1h	GhGLK55	25.6656
PEG 1h	GhGLK55	25.438
PEG 3h	GhGLK55	27.4084
PEG 3h	GhGLK55	27.2691
PEG 3h	GhGLK55	27.8136
PEG 6h	GhGLK55	26.428
PEG 6h	GhGLK55	26.4549
PEG 6h	GhGLK55	26.7397
PEG 12h	GhGLK55	26.6507
PEG 12h	GhGLK55	26.5997
PEG 12h	GhGLK55	26.9006
PEG 24h	GhGLK55	25.4354
PEG 24h	GhGLK55	25.0341
PEG 24h	GhGLK55	25.4417
0h	GhGLK55	25.5731
0h	GhGLK55	25.2423
0h	GhGLK55	25.9168
Cold 1h	GhGLK55	26.3221
Cold 1h	GhGLK55	26.5654
Cold 1h	GhGLK55	26.3833
Cold 3h	GhGLK55	25.803
Cold 3h	GhGLK55	25.6545
Cold 3h	GhGLK55	25.4157
Cold 6h	GhGLK55	27.0173
Cold 6h	GhGLK55	27.109
Cold 6h	GhGLK55	27.4567
Cold 12h	GhGLK55	27.5878
Cold 12h	GhGLK55	27.7028
Cold 12h	GhGLK55	27.2688
Cold 24h	GhGLK55	27.5842
Cold 24h	GhGLK55	27.4285
Cold 24h	GhGLK55	27.6379
0h	GhGLK55	27.1368
0h	GhGLK55	26.7794
0h	GhGLK55	27.033
NaCl 1h	GhGLK55	27.3254
NaCl 1h	GhGLK55	27.0228
NaCl 1h	GhGLK55	26.7684
NaCl 3h	GhGLK55	27.0566
NaCl 3h	GhGLK55	27.64
NaCl 3h	GhGLK55	27.6873
NaCl 6h	GhGLK55	27.698
NaCl 6h	GhGLK55	27.7698
NaCl 6h	GhGLK55	27.5866
NaCl 12h	GhGLK55	27.3298
NaCl 12h	GhGLK55	26.9248
NaCl 12h	GhGLK55	27.5377
NaCl 24h	GhGLK55	26.0208
NaCl 24h	GhGLK55	25.3509
NaCl 24h	GhGLK55	25.4941

## Sheet: GhGLK82
Sample Name	Target Name	CT
0h	GhGLK82	21.9727
0h	GhGLK82	21.9256
0h	GhGLK82	21.6016
PEG 1h	GhGLK82	20.9645
PEG 1h	GhGLK82	21.2055
PEG 1h	GhGLK82	20.8197
PEG 3h	GhGLK82	22.2368
PEG 3h	GhGLK82	22.2705
PEG 3h	GhGLK82	32.2609
PEG 6h	GhGLK82	21.7052
PEG 6h	GhGLK82	21.8388
PEG 6h	GhGLK82	21.7936
PEG 12h	GhGLK82	22.3867
PEG 12h	GhGLK82	22.2438
PEG 12h	GhGLK82	22.1536
PEG 24h	GhGLK82	20.9504
PEG 24h	GhGLK82	20.3078
PEG 24h	GhGLK82	20.4895
0h	GhGLK82	21.6833
0h	GhGLK82	22.1742
0h	GhGLK82	21.2886
Cold 1h	GhGLK82	26.6169
Cold 1h	GhGLK82	26.7253
Cold 1h	GhGLK82	27.0136
Cold 3h	GhGLK82	23.0281
Cold 3h	GhGLK82	22.8891
Cold 3h	GhGLK82	22.8576
Cold 6h	GhGLK82	24.9229
Cold 6h	GhGLK82	24.9303
Cold 6h	GhGLK82	24.7421
Cold 12h	GhGLK82	23.5821
Cold 12h	GhGLK82	23.6353
Cold 12h	GhGLK82	23.3271
Cold 24h	GhGLK82	27.5523
Cold 24h	GhGLK82	27.328
Cold 24h	GhGLK82	24.835
0h	GhGLK82	23.4126
0h	GhGLK82	22.7207
0h	GhGLK82	22.2315
NaCl 1h	GhGLK82	21.928
NaCl 1h	GhGLK82	21.7588
NaCl 1h	GhGLK82	20.2962
NaCl 3h	GhGLK82	23.5395
NaCl 3h	GhGLK82	22.6577
NaCl 3h	GhGLK82	22.6149
NaCl 6h	GhGLK82	21.7604
NaCl 6h	GhGLK82	22.4841
NaCl 6h	GhGLK82	21.2809
NaCl 12h	GhGLK82	23.4452
NaCl 12h	GhGLK82	24.1731
NaCl 12h	GhGLK82	23.8336
NaCl 24h	GhGLK82	21.6801
NaCl 24h	GhGLK82	22.2171
NaCl 24h	GhGLK82	21.9257

## Sheet: GhGLK120
Sample Name	Target Name	CT
0h	GhGLK120	26.789
0h	GhGLK120	26.889
0h	GhGLK120	30.9382
PEG 1h	GhGLK120	26.501
PEG 1h	GhGLK120	17.6423
PEG 1h	GhGLK120	26.8387
PEG 3h	GhGLK120	28.2692
PEG 3h	GhGLK120	26.5959
PEG 3h	GhGLK120	27.4748
PEG 6h	GhGLK120	26.7112
PEG 6h	GhGLK120	27.173
PEG 6h	GhGLK120	25.9881
PEG 12h	GhGLK120	27.4982
PEG 12h	GhGLK120	27.5447
PEG 12h	GhGLK120	27.5891
PEG 24h	GhGLK120	26.5742
PEG 24h	GhGLK120	26.8981
PEG 24h	GhGLK120	27.1464
0h	GhGLK120	25.1006
0h	GhGLK120	24.5326
0h	GhGLK120	25.4615
Cold 1h	GhGLK120	27.2057
Cold 1h	GhGLK120	26.542
Cold 1h	GhGLK120	24.9303
Cold 3h	GhGLK120	26.951
Cold 3h	GhGLK120	26.5507
Cold 3h	GhGLK120	24.9732
Cold 6h	GhGLK120	25.9501
Cold 6h	GhGLK120	26.5406
Cold 6h	GhGLK120	26.3483
Cold 12h	GhGLK120	27.0824
Cold 12h	GhGLK120	27.1572
Cold 12h	GhGLK120	26.5159
Cold 24h	GhGLK120	29.9242
Cold 24h	GhGLK120	30.5792
Cold 24h	GhGLK120	28.3314
0h	GhGLK120	27.4759
0h	GhGLK120	23.6783
0h	GhGLK120	27.252
NaCl 1h	GhGLK120	25.9819
NaCl 1h	GhGLK120	25.3498
NaCl 1h	GhGLK120	25.4071
NaCl 3h	GhGLK120	27.2056
NaCl 3h	GhGLK120	26.5794
NaCl 3h	GhGLK120	26.2715
NaCl 6h	GhGLK120	26.2578
NaCl 6h	GhGLK120	26.3049
NaCl 6h	GhGLK120	26.2342
NaCl 12h	GhGLK120	26.1078
NaCl 12h	GhGLK120	26.5822
NaCl 12h	GhGLK120	26.4206
NaCl 24h	GhGLK120	26.5596
NaCl 24h	GhGLK120	26.3713
NaCl 24h	GhGLK120	26.5048
